# Supplementary material for: O-Methylation of carboxylic acids with streptozotocin
Source: Royal Society of Chemistry journal article supplement (doi:10.1039/d2ob00578f), 2022-01-01

## Supporting information

### O-Methylation of carboxylic acids with streptozotocin

**Li-Yan Zeng<sup>+,b</sup>, Yang Liu<sup>+,a</sup>, Jiakun Han<sup>a</sup>, Jinhong Chen<sup>a</sup>, and Shuwen Liu<sup>\*a</sup>,  
Baomin Xi<sup>\*a</sup>**

<sup>a</sup> Guangdong Provincial Key Laboratory of New Drug Screening, School of Pharmaceutical Sciences, Southern Medical University, Guangzhou, China

<sup>b</sup> College of Chemistry and Chemical Engineering, Zhongkai University of Agriculture and Engineering, Guangzhou, 510225, China

<sup>+</sup> These authors contributed equally to this work.

E-mail: liusw@smu.edu.cn (S. Liu), xibaomin@smu.edu.cn (B. Xi).

# Supporting information

## Contents

|   |                                            |        |
|---|--------------------------------------------|--------|
| 1 | General information                        | S1     |
| 2 | General experimental details               | S1     |
| 3 | Analytical Data                            | S1-S8  |
| 4 | $^1\text{H}$ , $^{13}\text{C}$ NMR spectra | S9-S39 |

## 1 General information :

All of the reagents were obtained from commercial suppliers and used without further purification. All compounds were structurally verified by  $^1\text{H}$  NMR and  $^{13}\text{C}$  NMR.  $^1\text{H}$ ,  $^{13}\text{C}$  NMR spectra were recorded on a Bruker Advance drx 400 spectrometer operating at 400MHz, and the chemical shifts are reported in ppm and the coupling constant in Hz.

## 2 General experimental details

### The methyl esterification of carboxylic acid:

To a vial, carboxylic acid substrate (0.1 mmol), and sodium carbonate (0.4 mmol) were added followed by dioxane (0.95 mL) and water (0.05 mL). Stir the mixture for 2 mins, then add STZ (0.2 mmol). The reaction mixture was stirred at room temperature in open container. After 4 h, the reaction was stopped and the solvent was removed. The residue was dissolved in ethyl acetate, then washed by water, and dried following by removing ethyl acetate on vacuum distiller to afford the pure methyl ester product.

### The methyl esterification of sulfonic acid:

To a vial, sulfonic acid substrate (0.1 mmol), and sodium carbonate (0.4 mmol) were added followed by dioxane (0.95 mL) then water (0.05 mL). Stir the mixture for 2 mins, then add STZ (0.2 mmol). The reaction mixture was stirred at room temperature in open container. After 4 h, the reaction was stopped and the solvent was removed. The residue was dissolved in ethyl acetate, then washed by water, and dried following by removing ethyl acetate on rotoevaporator to afford the pure methyl ester product.

### The methyl esterification of phosphonic acid:

To a vial, phosphoric acid substrate (0.1 mmol), and sodium carbonate (0.4 mmol) were added followed by dioxane (0.95 mL) then water (0.05 mL). Stir the mixture for 2 mins, then add STZ (0.2 mmol). The reaction mixture was stirred at room temperature in open container. After 4 h, the reaction was stopped and the solvent was removed. The residue was dissolved in ethyl acetate, then washed by water, and dried following by removing ethyl acetate on rotoevaporator to afford the pure methyl ester product.

## 3 Analytical Data:

### Methyl cinnamate(2a)

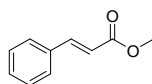

yield 83%

$^1\text{H}$  NMR (400 MHz,  $\text{CDCl}_3$ )  $\delta$  7.73 (d,  $J$  = 16.0 Hz, 1H), 7.55 (dd,  $J$  = 6.5, 2.8 Hz, 2H), 7.46 - 7.37 (m, 3H), 6.47 (d,  $J$  = 16.0 Hz, 1H), 3.84 (s, 3H).

$^{13}\text{C}$  NMR (101 MHz,  $\text{CDCl}_3$ )  $\delta$  167.37, 144.82, 134.35, 130.23, 128.83, 128.01, 117.77, 51.63.

### (E)-methyl 3-(4-chlorophenyl)acrylate(2b)

yield 85%

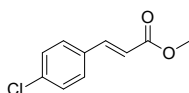

$^1\text{H NMR}$  (400 MHz,  $\text{CDCl}_3$ )  $\delta$  7.66 (d,  $J = 16.0$  Hz, 1H), 7.48 (d,  $J = 8.5$  Hz, 2H), 7.38 (d,  $J = 8.4$  Hz, 2H), 6.43 (d,  $J = 16.0$  Hz, 1H), 3.83 (s, 3H).

$^{13}\text{C NMR}$  (101 MHz,  $\text{CDCl}_3$ )  $\delta$  167.12, 143.36, 136.16, 132.83, 129.15 (d,  $J = 3.9$  Hz), 118.34, 51.73.

**(E)-methyl 3-(2-chlorophenyl)acrylate(2c)**

yield 85%

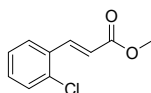

$^1\text{H NMR}$  (400 MHz,  $\text{CDCl}_3$ )  $\delta$  8.12 (d,  $J = 16.0$  Hz, 1H), 7.66 - 7.59 (m, 1H), 7.49 - 7.40 (m, 1H), 7.33 (dt,  $J = 7.4, 5.8$  Hz, 2H), 6.46 (d,  $J = 16.0$  Hz, 1H), 3.85 (s, 3H).

$^{13}\text{C NMR}$  (101 MHz,  $\text{CDCl}_3$ )  $\delta$  166.85, 140.58, 134.90, 132.64, 130.99, 130.12, 127.57, 127.02, 120.43, 51.79.

**(E)-methyl 3-(2-methoxyphenyl)acrylate(2d)**

yield 79%

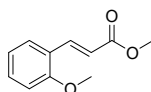

$^1\text{H NMR}$  (400 MHz,  $\text{CDCl}_3$ )  $\delta$  8.03 (d,  $J = 16.2$  Hz, 1H), 7.53 (d,  $J = 7.6$  Hz, 1H), 7.38 (t,  $J = 7.8$  Hz, 1H), 7.03 - 6.89 (m, 2H), 6.56 (d,  $J = 16.2$  Hz, 1H), 3.91 (s, 3H), 3.83 (s, 3H).

$^{13}\text{C NMR}$  (101 MHz,  $\text{CDCl}_3$ )  $\delta$  167.88, 158.31, 140.22, 131.42, 128.87, 123.34, 120.65, 118.28, 111.09, 55.42, 51.52.

**(E)-methyl 3-(4-methoxyphenyl)acrylate(2e)**

yield 63%

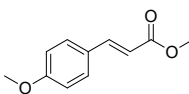

$^1\text{H NMR}$  (400 MHz,  $\text{CDCl}_3$ )  $\delta$  7.68 (d,  $J = 16.0$  Hz, 1H), 7.50 (d,  $J = 8.7$  Hz, 2H), 6.93 (d,  $J = 8.7$  Hz, 2H), 6.34 (d,  $J = 16.0$  Hz, 1H), 3.86 (s, 3H), 3.82 (s, 3H).

$^{13}\text{C NMR}$  (101 MHz,  $\text{CDCl}_3$ )  $\delta$  167.71, 161.35, 144.47, 129.67, 127.08, 115.23, 114.28, 55.32, 51.52.

**(E)-methyl 3-(4-(dimethylamino)phenyl)acrylate(2f)**

yield 92%

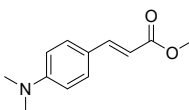

$^1\text{H NMR}$  (400 MHz,  $\text{CDCl}_3$ )  $\delta$  7.93 (d,  $J = 9.0$  Hz, 2H), 6.67 (d,  $J = 8.9$  Hz, 2H), 3.88 (s, 3H), 3.06 (s, 6H).

$^{13}\text{C NMR}$  (101 MHz,  $\text{CDCl}_3$ )  $\delta$  167.45, 153.25, 131.19, 116.92, 110.64, 51.41, 39.98.

**Methyl 4-methylbenzoate(2g)**

yield 84%

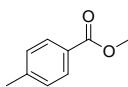

$^1\text{H NMR}$  (400 MHz,  $\text{CDCl}_3$ )  $\delta$  7.96 (d,  $J = 8.0$  Hz, 2H), 7.27 (d,  $J = 7.8$  Hz, 2H), 3.93 (s, 3H), 2.44 (s, 3H).

$^{13}\text{C NMR}$  (101 MHz,  $\text{CDCl}_3$ )  $\delta$  167.14, 143.49, 129.54, 129.01, 127.39, 51.88, 21.59.

**Methyl 4-chlorobenzoate(2h)**

yield 89%

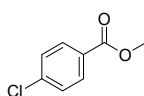

$^1\text{H NMR}$  (400 MHz,  $\text{CDCl}_3$ )  $\delta$  8.00 (d,  $J = 8.6$  Hz, 2H), 7.43 (d,  $J = 8.6$  Hz, 2H), 3.94 (s, 3H).

$^{13}\text{C NMR}$  (101 MHz,  $\text{CDCl}_3$ )  $\delta$  166.17, 139.32, 130.92, 128.60 (d,  $J = 10.9$  Hz), 52.20.

**Methyl 4-hydroxybenzoate(2i)**

yield 74%

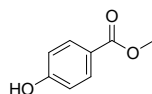

$^1\text{H NMR}$  (400 MHz,  $\text{CDCl}_3$ )  $\delta$  7.98 (d,  $J = 8.6$  Hz, 2H), 6.90 (d,  $J = 8.6$  Hz, 2H), 6.32 (s, 1H), 3.92 (s, 3H).

$^{13}\text{C NMR}$  (101 MHz,  $\text{CDCl}_3$ )  $\delta$  167.25, 160.14, 131.89, 122.34, 115.21, 51.98.

**Methyl 1-naphthoate(2j)**

yield 94%

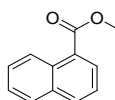

$^1\text{H NMR}$  (400 MHz,  $\text{CDCl}_3$ )  $\delta$  8.64 (s, 1H), 8.09 (dd,  $J = 8.6, 1.4$  Hz, 1H), 7.98 (d,  $J = 8.0$  Hz, 1H), 7.91 (d,  $J = 8.7$  Hz, 2H), 7.64 - 7.53 (m, 2H), 4.01 (s, 3H).

$^{13}\text{C NMR}$  (101 MHz,  $\text{CDCl}_3$ )  $\delta$  167.24, 135.48, 132.45, 131.02, 129.30, 128.14 (d,  $J = 8.3$  Hz), 127.71, 127.35, 126.58, 125.17, 52.17.

**Methyl 4-aminobenzoate(2k)**

yield 12%

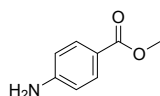

$^1\text{H NMR}$  (400 MHz,  $\text{CDCl}_3$ )  $\delta$  7.88 (d,  $J = 8.6$  Hz, 2H), 6.67 (d,  $J = 8.7$  Hz, 2H), 4.06 (s, 2H), 3.88 (s, 3H).

$^{13}\text{C}$  NMR (101 MHz,  $\text{CDCl}_3$ )  $\delta$  167.09, 150.71, 131.55, 119.76, 113.75, 51.55.

**Methyl 4-(methyamino)benzoate(byproduct of 2k)**

yield 8%

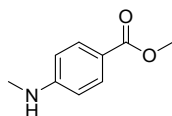

$^1\text{H}$  NMR (400 MHz,  $\text{CDCl}_3$ )  $\delta$  7.90 (d,  $J = 8.7$  Hz, 2H), 6.58 (d,  $J = 8.7$  Hz, 2H), 4.19 (s, 1H), 3.88 (s, 3H), 2.92 (d,  $J = 2.4$  Hz, 3H).

$^{13}\text{C}$  NMR (101 MHz,  $\text{CDCl}_3$ )  $\delta$  167.30, 152.62, 131.46, 118.39, 111.21, 51.48, 30.21.

**4-(dimethoxymethyl)benzoic acid(2l)**

yield 95%

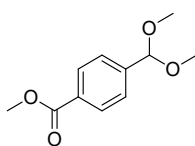

$^1\text{H}$  NMR (400 MHz,  $\text{CDCl}_3$ )  $\delta$  8.06 (d,  $J = 8.0$  Hz, 2H), 7.55 (d,  $J = 8.0$  Hz, 2H), 5.46 (s, 1H), 3.93 (s, 3H), 3.34 (s, 6H).

$^{13}\text{C}$  NMR (101 MHz,  $\text{CDCl}_3$ )  $\delta$  166.84, 142.85, 130.14, 129.47, 126.74, 102.29, 77.30, 76.98, 76.66, 52.61, 52.08.

**Methyl 3-phenylpropanoate(2m)**

yield 67%

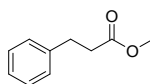

$^1\text{H}$  NMR (400 MHz, DMSO)  $\delta$  7.29 (t,  $J = 7.4$  Hz, 2H), 7.20 (dd,  $J = 16.1, 7.4$  Hz, 3H), 3.59 (s, 3H), 2.86 (t,  $J = 7.6$  Hz, 2H), 2.63 (t,  $J = 7.6$  Hz, 2H).

$^{13}\text{C}$  NMR (101 MHz, DMSO)  $\delta$  173.06, 140.91, 128.67 (d,  $J = 12.0$  Hz), 126.48, 51.67, 35.27, 30.64.

**Methyl 3-cyclohexylpropanoate(2n)**

yield 78%

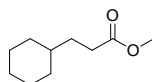

$^1\text{H}$  NMR (400 MHz,  $\text{CDCl}_3$ )  $\delta$  3.68 (s, 3H), 2.38 - 2.28 (m, 2H), 1.69 (t,  $J = 16.1$  Hz, 5H), 1.54 (dd,  $J = 15.4, 7.2$  Hz, 2H), 1.30 - 1.16 (m, 4H), 0.90 (dd,  $J = 21.7, 11.4$  Hz, 2H).

$^{13}\text{C}$  NMR (101 MHz,  $\text{CDCl}_3$ )  $\delta$  174.61, 51.41, 37.15, 32.89, 32.27, 31.63, 26.46, 26.15.

**Methyl 4-cyclohexylbutanoate(2o)**

yield 82%

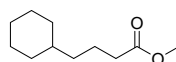

$^1\text{H}$  NMR (400 MHz,  $\text{CDCl}_3$ )  $\delta$  3.68 (s, 3H), 2.30 (t,  $J = 7.6$  Hz, 2H), 1.76 - 1.59 (m, 7H), 1.20 (dq,  $J = 24.5, 12.4$  Hz, 6H), 0.88 (dd,  $J = 20.8, 10.6$  Hz, 2H).

$^{13}\text{C}$  NMR (101 MHz,  $\text{CDCl}_3$ )  $\delta$  174.33, 51.37, 37.31, 36.84, 34.34, 33.17, 26.59, 26.27, 22.29.

### Methyl 2-cyclohexylacetate(2p)

yield 73%

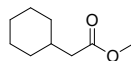

$^1\text{H}$  NMR (400 MHz,  $\text{CDCl}_3$ )  $\delta$  3.68 (s, 3H), 2.21 (d,  $J = 7.0$  Hz, 2H), 1.72 (dt,  $J = 26.4, 15.8$  Hz, 5H), 1.25 (ddd,  $J = 40.1, 18.6, 8.0$  Hz, 4H), 1.04 - 0.93 (m, 2H).

$^{13}\text{C}$  NMR (101 MHz,  $\text{CDCl}_3$ )  $\delta$  173.58, 51.28, 41.92, 34.82, 32.97, 26.01 (d,  $J = 11.7$  Hz).

### Methyl 4-(1H-indol-3-yl)butanoate(2q)

yield 74%

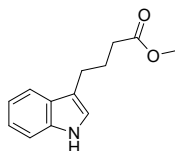

$^1\text{H}$  NMR (400 MHz,  $\text{CDCl}_3$ )  $\delta$  8.01 (s, 1H), 7.65 (d,  $J = 7.9$  Hz, 1H), 7.38 (d,  $J = 8.1$  Hz, 1H), 7.23 (t,  $J = 7.5$  Hz, 1H), 7.15 (t,  $J = 7.4$  Hz, 1H), 7.03 - 6.99 (m, 1H), 3.70 (s, 3H), 2.85 (t,  $J = 7.4$  Hz, 2H), 2.43 (t,  $J = 7.5$  Hz, 2H), 2.14 - 2.05 (m, 2H).

$^{13}\text{C}$  NMR (101 MHz,  $\text{CDCl}_3$ )  $\delta$  174.20, 136.34, 127.40, 121.90, 121.42, 119.16, 118.84, 115.55, 111.04, 51.43, 33.65, 25.30, 24.46.

### Methyl 2-(6-chloro-9H-carbazol-2-yl)propanoate(2r)

yield 88%

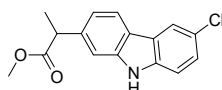

$^1\text{H}$  NMR (400 MHz,  $\text{CDCl}_3$ )  $\delta$  8.20 (s, 1H), 7.95 (d,  $J = 1.6$  Hz, 1H), 7.90 (d,  $J = 8.1$  Hz, 1H), 7.34 - 7.28 (m, 2H), 7.24 (s, 1H), 7.15 (d,  $J = 8.1$  Hz, 1H), 3.87 (q,  $J = 7.1$  Hz, 1H), 3.68 (s, 3H), 1.57 (d,  $J = 7.2$  Hz, 3H).

$^{13}\text{C}$  NMR (101 MHz,  $\text{CDCl}_3$ )  $\delta$  175.41, 140.33, 139.11, 138.04, 125.75, 124.84, 124.21, 121.60, 120.56, 119.88, 119.54, 111.54, 109.51, 52.14, 45.78, 18.90.

### Methyl 2-(1-(4-chlorobenzoyl)-5-methoxy-2-methyl-1H-indol-3-yl)acetate(2s)

yield 92%

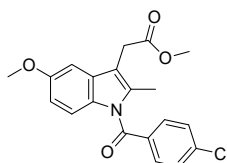

$^1\text{H}$  NMR (400 MHz,  $\text{CDCl}_3$ )  $\delta$  7.68 (d,  $J = 8.4$  Hz, 2H), 7.49 (d,  $J = 8.4$  Hz, 2H), 6.98 (d,  $J = 2.4$  Hz, 1H), 6.89 (d,  $J = 9.0$  Hz, 1H), 6.69 (dd,  $J = 9.0, 2.5$  Hz, 1H), 3.86 (s, 3H), 3.73 (s, 3H), 3.69 (s, 2H), 2.41 (s, 3H).

$^{13}\text{C}$  NMR (101 MHz,  $\text{CDCl}_3$ )  $\delta$  171.30, 168.24, 156.01, 139.20, 135.91, 133.86, 131.12, 130.68 (d,  $J = 16.2$  Hz), 129.06, 114.90, 112.46, 111.55, 101.29, 55.66, 52.10, 30.07, 13.27.

**(Z)-methyl 2-(5-fluoro-2-methyl-1-(4-(methylsulfinyl)benzylidene)-1H-inden-3-yl)acetate(2t)**  
yield 79%

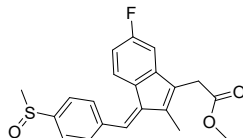

$^1\text{H}$  NMR (400 MHz,  $\text{CDCl}_3$ )  $\delta$  7.73 (d,  $J = 8.3$  Hz, 2H), 7.68 (d,  $J = 8.1$  Hz, 2H), 7.16 (dd,  $J = 7.6, 4.3$  Hz, 2H), 6.89 (dd,  $J = 8.9, 2.2$  Hz, 1H), 6.57 (td,  $J = 9.1, 2.3$  Hz, 1H), 3.72 (s, 3H), 3.58 (s, 2H), 2.82 (s, 3H), 2.22 (s, 3H).

$^{13}\text{C}$  NMR (101 MHz,  $\text{CDCl}_3$ )  $\delta$  170.63, 164.53, 162.08, 146.65 (d,  $J = 8.8$  Hz), 145.44, 141.59, 139.62, 138.14, 131.71 (d,  $J = 2.5$  Hz), 130.18, 129.44 (d,  $J = 2.9$  Hz), 128.15 (d,  $J = 1.7$  Hz), 123.86 - 123.35 (m), 110.83, 110.60, 106.16, 105.93, 52.18, 43.83, 31.51, 10.46.

**Methyl 2-(1-methyl-5-(4-methylbenzoyl)-1H-pyrrol-2-yl)acetate(2u)**  
yield 97%

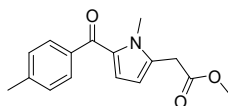

$^1\text{H}$  NMR (400 MHz,  $\text{CDCl}_3$ )  $\delta$  7.71 (d,  $J = 8.0$  Hz, 2H), 7.24 (d,  $J = 7.9$  Hz, 2H), 6.67 (d,  $J = 4.0$  Hz, 1H), 6.10 (d,  $J = 4.0$  Hz, 1H), 3.94 (s, 3H), 3.74 (s, 3H), 3.72 (s, 2H), 2.41 (s, 3H).

$^{13}\text{C}$  NMR (101 MHz,  $\text{CDCl}_3$ )  $\delta$  185.84, 169.76, 141.84, 137.27, 134.32, 131.40, 129.38, 128.63, 122.18, 109.38, 52.39, 33.12, 32.66, 21.47.

**Methyl 4-(N,N-dipropylsulfamoyl)benzoate(2v)**  
yield 89%

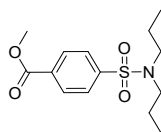

$^1\text{H}$  NMR (400 MHz,  $\text{CDCl}_3$ )  $\delta$  8.17 (d,  $J = 8.3$  Hz, 2H), 7.89 (d,  $J = 8.3$  Hz, 2H), 3.97 (s, 3H), 3.16 - 3.05 (m, 4H), 1.61 - 1.50 (m, 4H), 0.88 (t,  $J = 7.4$  Hz, 6H).

$^{13}\text{C}$  NMR (101 MHz,  $\text{CDCl}_3$ )  $\delta$  165.68, 144.23, 133.36, 130.15, 126.93, 52.52, 49.83, 21.84, 11.07.

**(Z)-methyl 2-((3R,4S,5S,8S,9S,10S,11R,13R,14S,16S)-16-acetoxy-3,11-dihydroxy-4,8,10,14-tetramethyldodecahydro-1H-cyclopenta[a]phenanthren-17(2H,10H,14H)-ylidene)-6-methylhept-5-enoate(2w)**  
yield 93%



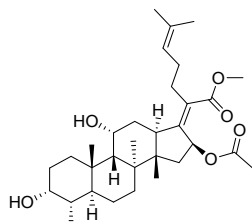

$^1\text{H}$  NMR (400 MHz,  $\text{CDCl}_3$ )  $\delta$  7.72 (d,  $J = 8.3$  Hz, 2H), 7.66 (d,  $J = 8.1$  Hz, 2H), 7.14 (dd,  $J = 7.6, 4.3$  Hz, 2H), 6.88 (dd,  $J = 8.9, 2.2$  Hz, 1H), 6.56 (td,  $J = 9.1, 2.3$  Hz, 1H), 3.71 (s, 3H), 3.57 (s, 2H), 2.81 (s, 3H), 2.21 (s, 3H).

$^{13}\text{C}$  NMR (101 MHz,  $\text{CDCl}_3$ )  $\delta$  170.63, 164.53, 162.08, 146.65 (d,  $J = 8.8$  Hz), 145.44, 141.59, 139.62, 138.14, 131.71 (d,  $J = 2.5$  Hz), 130.18, 129.44 (d,  $J = 2.9$  Hz), 128.15 (d,  $J = 1.7$  Hz), 123.86 - 123.35 (m), 110.83, 110.60, 106.16, 105.93, 52.18, 43.83, 31.51, 10.46.

**(1S,2S,4aR,4bR,7S,9aS,10S,10aR)-methyl 2,7-dihydroxy-1-methyl-8-methylene-13-oxo-1,2,4b,5,6,7,8,9,10,10a-decahydro-4a,1-(epoxymethano)-7,9a-methanobenzo[a]azulene-10-carboxylate(2x)**

yield 84%

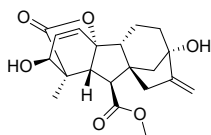

$^1\text{H}$  NMR (400 MHz, DMSO)  $\delta$  6.34 (d,  $J = 9.3$  Hz, 1H), 5.81 (dd,  $J = 9.3, 3.6$  Hz, 1H), 5.60 (d,  $J = 6.7$  Hz, 1H), 5.14 (s, 1H), 4.87 (d,  $J = 5.6$  Hz, 2H), 3.89 (dd,  $J = 6.5, 3.6$  Hz, 1H), 3.67 (d,  $J = 8.3$  Hz, 3H), 3.14 (d,  $J = 10.7$  Hz, 1H), 2.61 (d,  $J = 10.8$  Hz, 1H), 2.16 (d,  $J = 15.6$  Hz, 1H), 2.03 - 1.97 (m, 1H), 1.91 (dd,  $J = 16.9, 9.8$  Hz, 2H), 1.76 (dd,  $J = 10.7, 1.7$  Hz, 1H), 1.69 - 1.58 (m, 4H), 1.05 (s, 3H).

$^{13}\text{C}$  NMR (101 MHz, DMSO)  $\delta$  178.89, 172.54, 157.86, 133.73, 131.79, 106.85, 90.88, 76.98, 68.85, 53.42, 52.56, 52.31, 50.83 (d,  $J = 18.1$  Hz), 50.21, 44.67, 43.15, 16.94, 14.85.

**Methyl 4'-((1,7'-dimethyl-2'-propyl-1H,3'H-[2,5'-bibenzo[d]imidazol]-3'-yl)methyl)-[1,1'-biphenyl]-2-carboxylate(2y)**

yield 89%

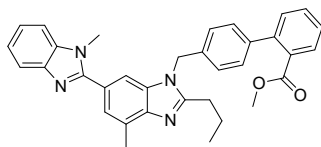

$^1\text{H}$  NMR (400 MHz,  $\text{CDCl}_3$ )  $\delta$  7.80 (d,  $J = 7.6$  Hz, 2H), 7.47 (dd,  $J = 18.5, 10.1$  Hz, 3H), 7.37 (t,  $J = 7.3$  Hz, 1H), 7.33 - 7.22 (m, 6H), 7.09 (d,  $J = 8.0$  Hz, 2H), 5.43 (s, 2H), 3.76 (s, 3H), 3.56 (s, 3H), 2.99 - 2.88 (m, 2H), 2.77 (s, 3H), 1.93 - 1.79 (m, 2H), 1.05 (t,  $J = 7.3$  Hz, 3H).

$^{13}\text{C}$  NMR (101 MHz,  $\text{CDCl}_3$ )  $\delta$  = 168.60, 156.44, 154.57, 143.09, 142.74, 141.67, 141.08, 136.58, 134.99, 134.72, 131.32, 130.63, 130.52, 129.86, 129.39, 128.95, 127.33, 125.90, 123.79, 123.75, 122.46, 122.28, 119.41, 109.48, 108.94, 51.81, 47.05, 31.75, 29.77, 21.79, 16.85, 14.04.

**Methyl benzenesulfonate(4a)**

yield 30%

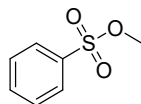

$^1\text{H NMR}$  (400 MHz,  $\text{CDCl}_3$ )  $\delta$  7.99 - 7.91 (m, 2H), 7.69 (d,  $J = 7.4$  Hz, 1H), 7.60 (t,  $J = 7.7$  Hz, 2H), 3.80 (s, 3H).

$^{13}\text{C NMR}$  (101 MHz,  $\text{CDCl}_3$ )  $\delta$  133.82, 129.25, 128.03, 56.27, 29.70.

#### Methyl 4-chlorobenzenesulfonate(4b)

yield 24%

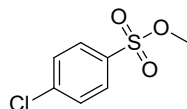

$^1\text{H NMR}$  (400 MHz,  $\text{CDCl}_3$ )  $\delta$  7.88 (d,  $J = 8.6$  Hz, 2H), 7.57 (d,  $J = 8.6$  Hz, 2H), 3.81 (s, 3H).

$^{13}\text{C NMR}$  (101 MHz,  $\text{CDCl}_3$ )  $\delta$  140.57, 133.75, 129.49 (d,  $J = 16.8$  Hz), 56.36, 29.63.

#### Methyl 4-methoxybenzenesulfonate(4c)

yield 38%

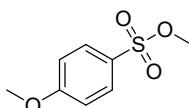

$^1\text{H NMR}$  (400 MHz,  $\text{CDCl}_3$ )  $\delta$  7.87 (d,  $J = 8.8$  Hz, 2H), 7.04 (d,  $J = 8.8$  Hz, 2H), 3.92 (s, 3H), 3.76 (s, 3H).

$^{13}\text{C NMR}$  (101 MHz,  $\text{CDCl}_3$ )  $\delta$  163.78, 130.21, 126.59, 114.39, 55.92, 55.65.

#### Methyl diphenylphosphinate(6a)

yield 62%

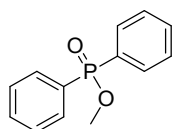

$^1\text{H NMR}$  (400 MHz,  $\text{CDCl}_3$ )  $\delta$  7.90 - 7.77 (m, 4H), 7.60 - 7.39 (m, 6H), 3.79 (d,  $J = 11.1$  Hz, 3H).

$^{13}\text{C NMR}$  (101 MHz,  $\text{CDCl}_3$ )  $\delta$  132.16 (d,  $J = 2.8$  Hz), 131.63 (d,  $J = 10.1$  Hz), 130.34, 128.52 (d,  $J = 13.1$  Hz), 51.49 (d,  $J = 6.0$  Hz).

#### Methyl diphenyl phosphate(6b)

yield 42%

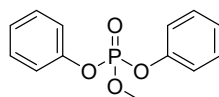

$^1\text{H NMR}$  (400 MHz, DMSO)  $\delta$  7.45 (t,  $J = 7.6$  Hz, 4H), 7.27 (t,  $J = 9.8$  Hz, 6H), 3.94 (d,  $J = 11.6$  Hz, 3H).

$^{13}\text{C NMR}$  (101 MHz, DMSO)  $\delta$  150.43 (d,  $J = 7.0$  Hz), 130.53, 126.01, 120.29 (d,  $J = 4.8$  Hz), 56.07 (d,  $J = 6.6$  Hz).

# 4 <sup>1</sup>H, <sup>13</sup>C NMR spectra

2a

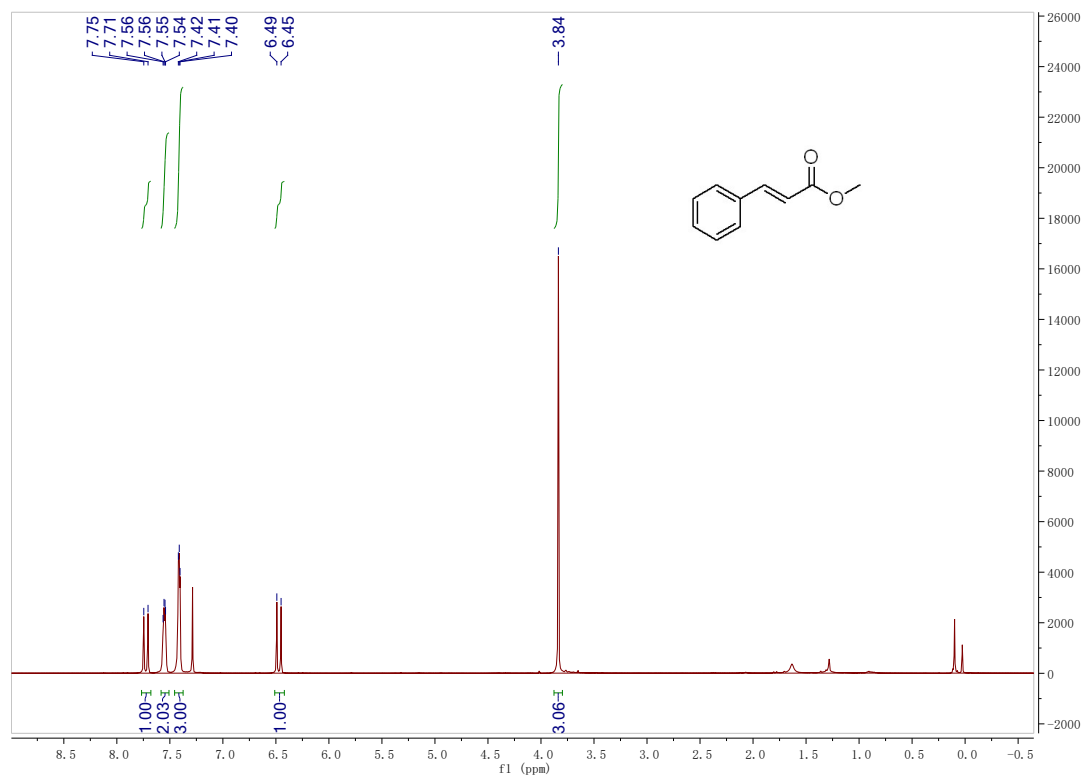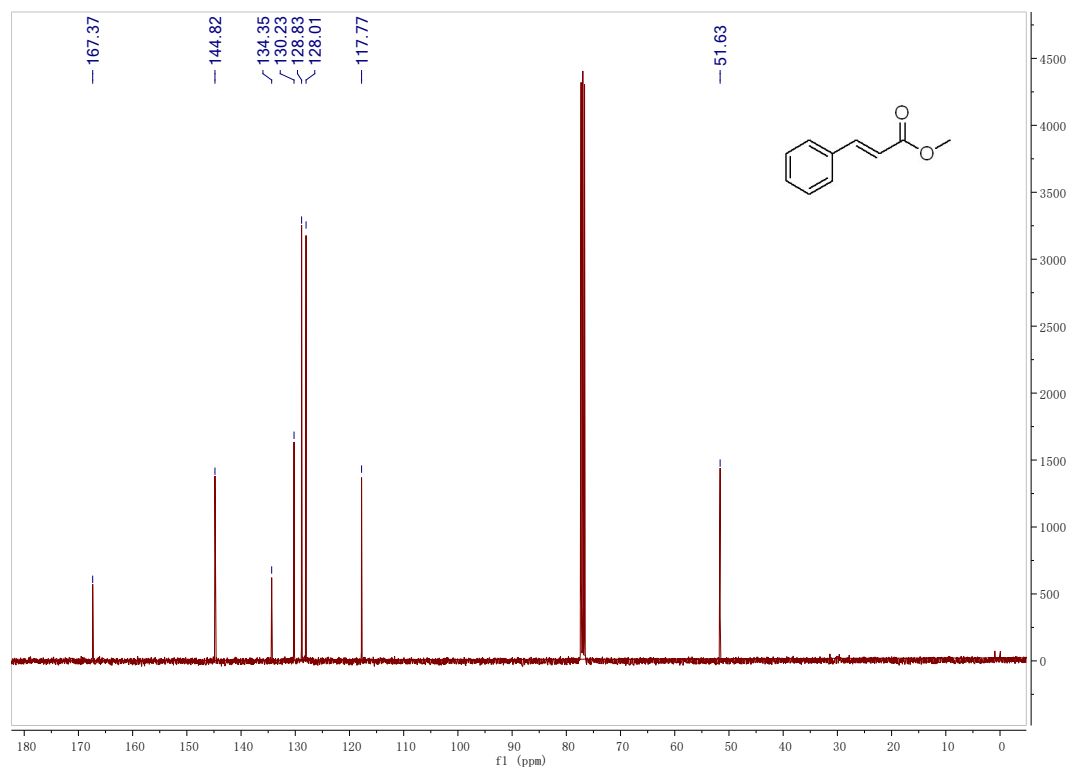

2b

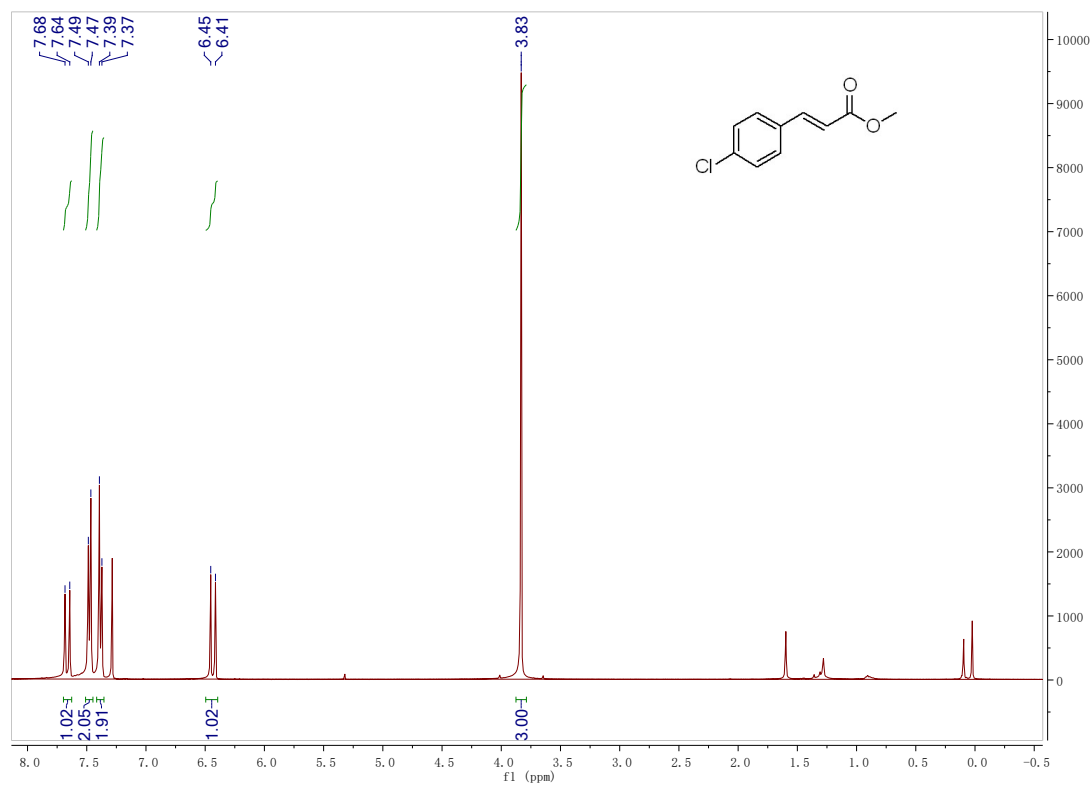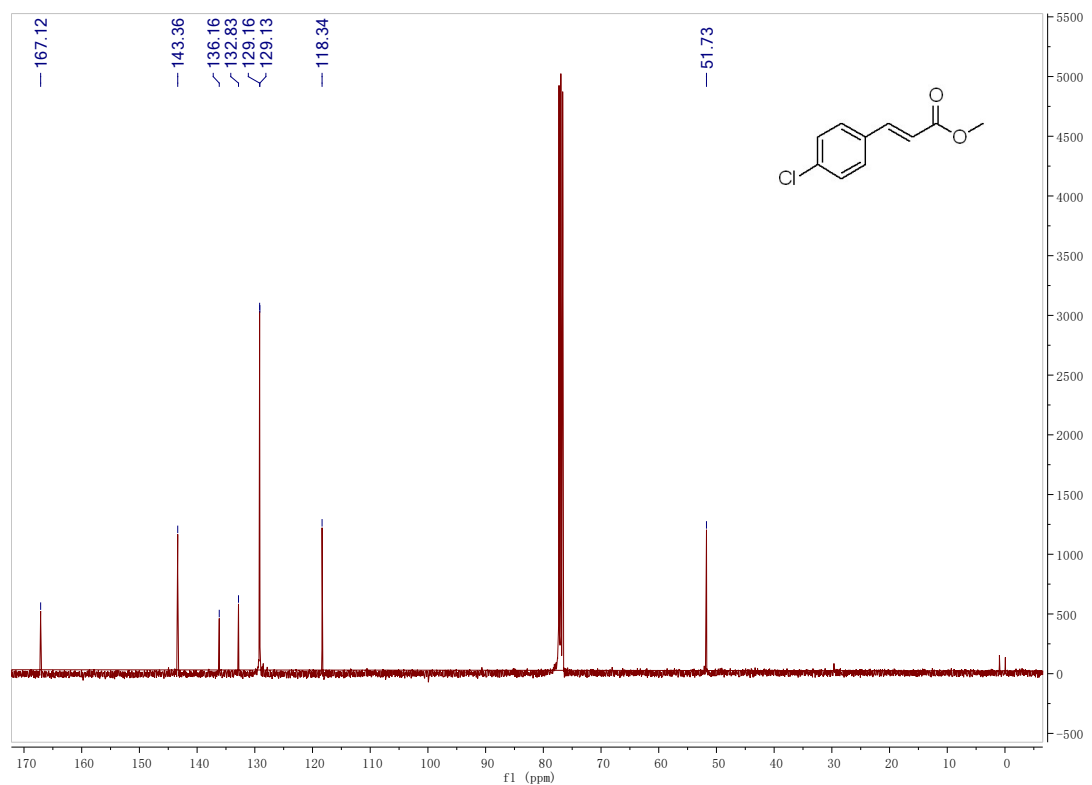

2c

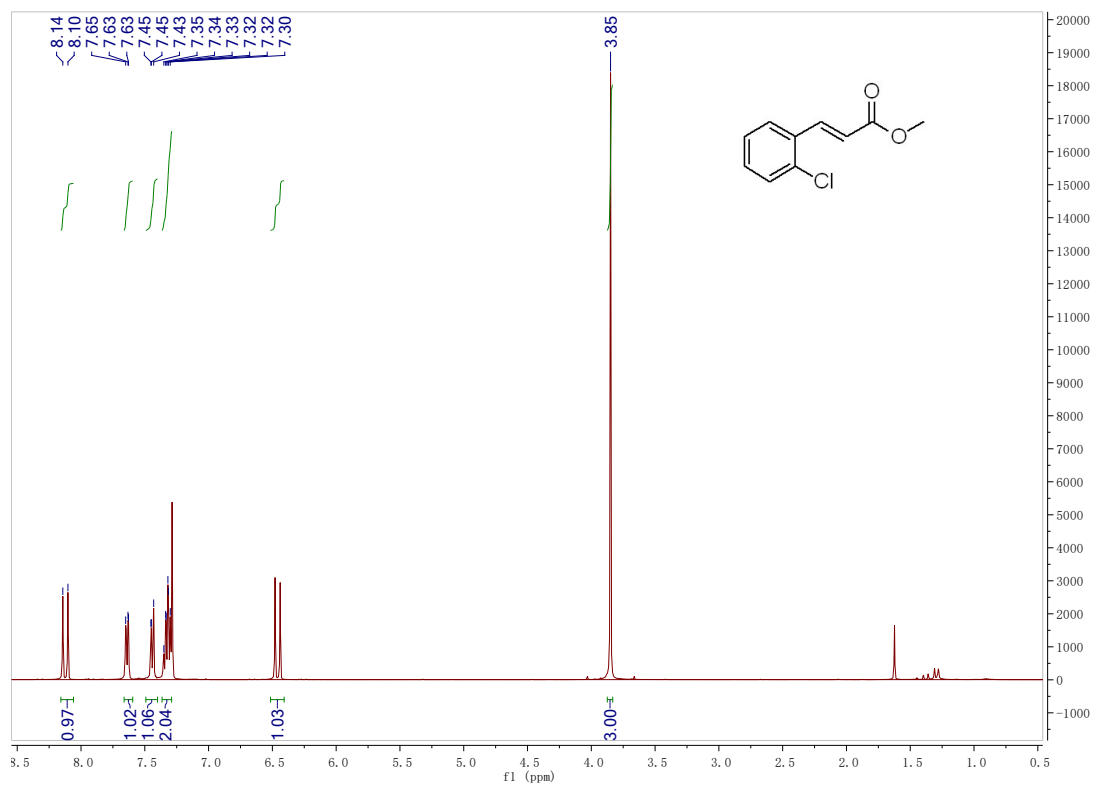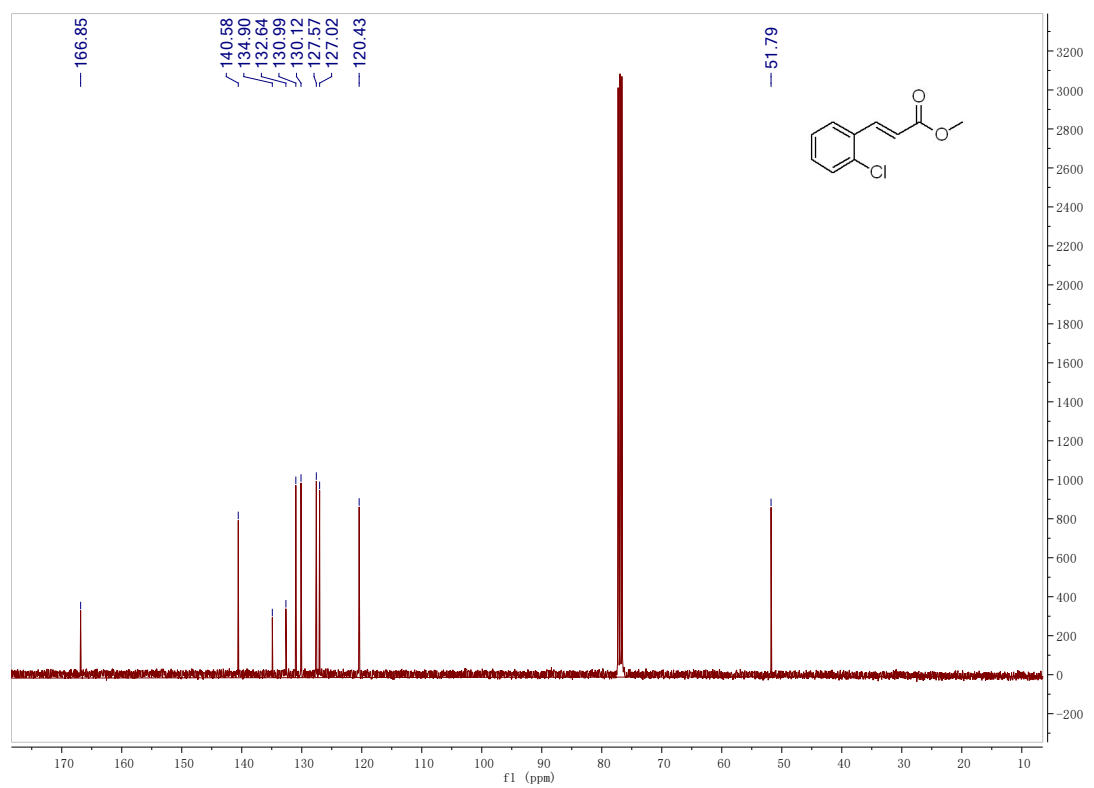

2d

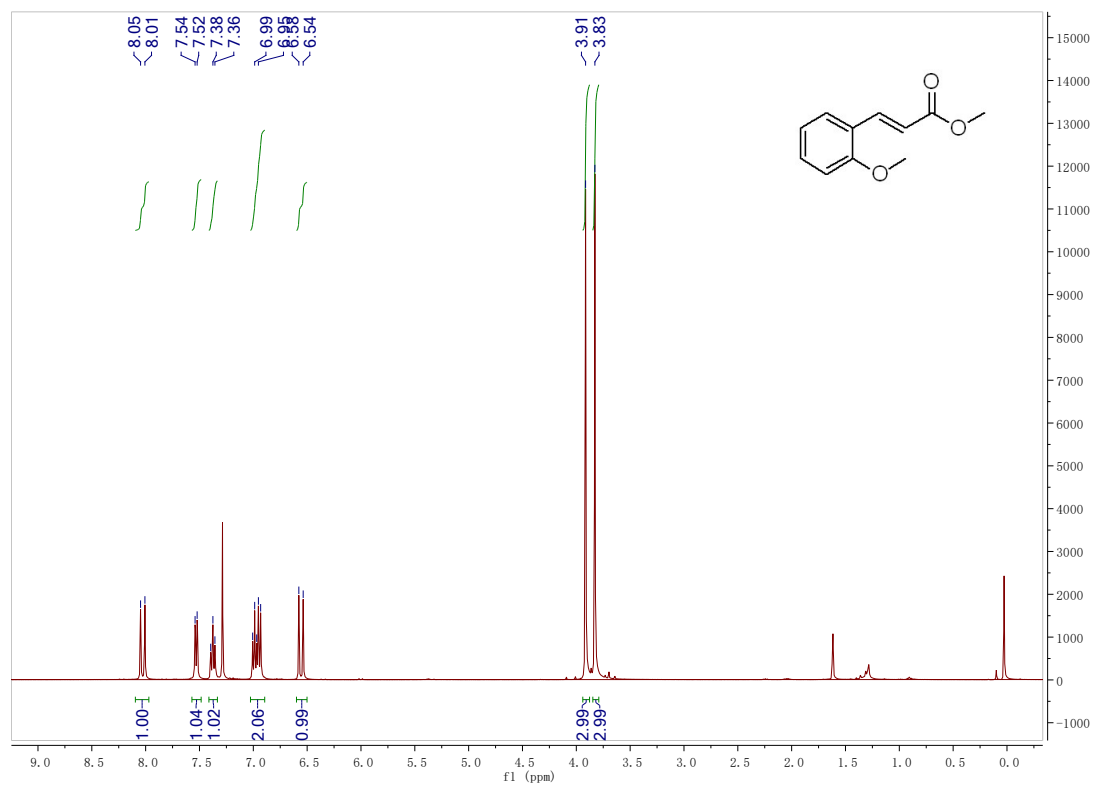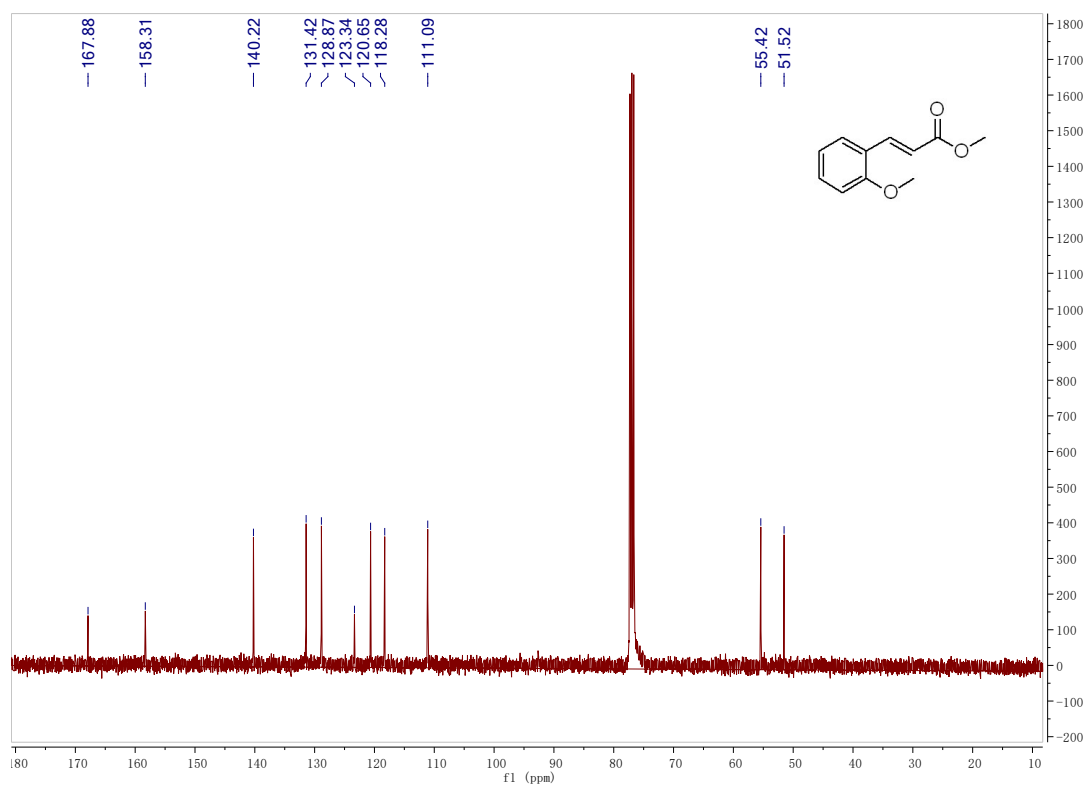

2e

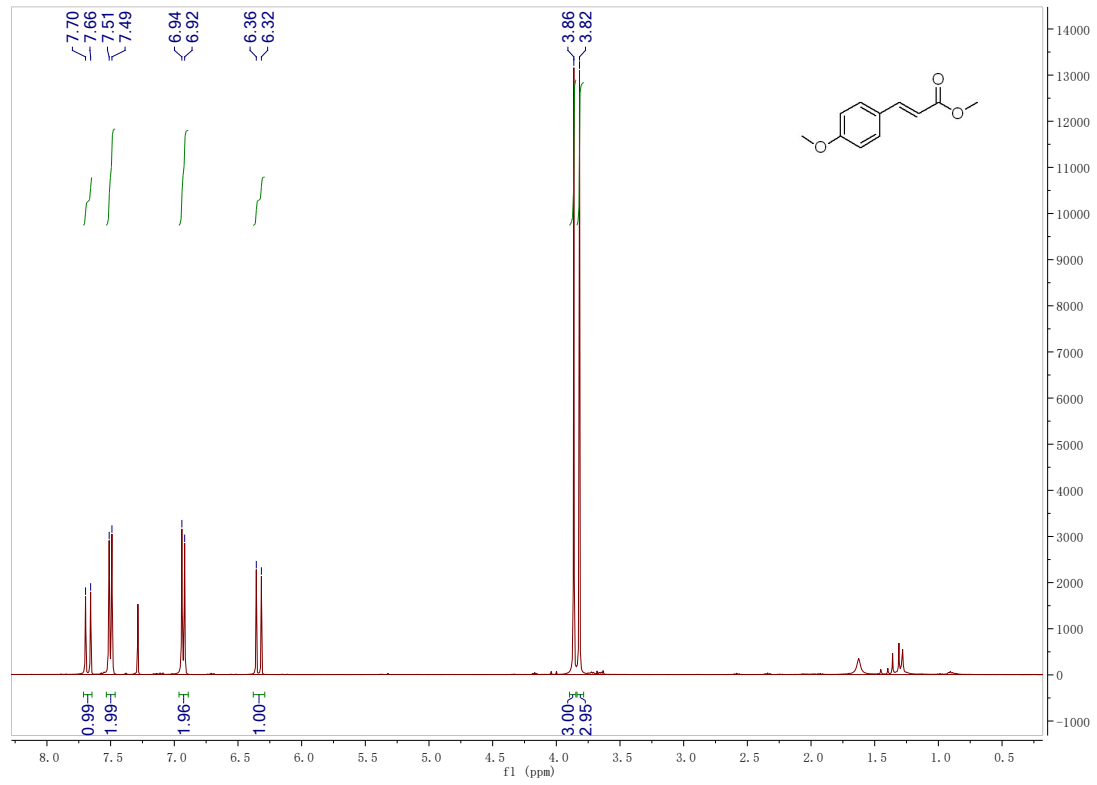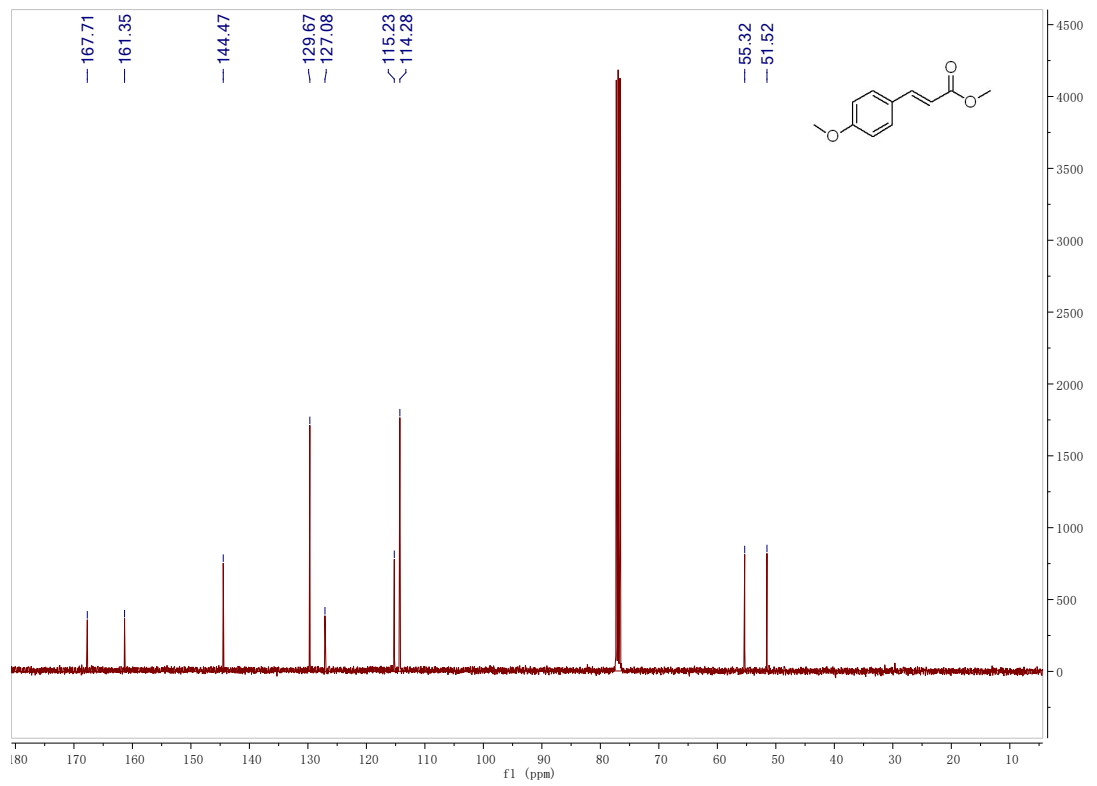

2f

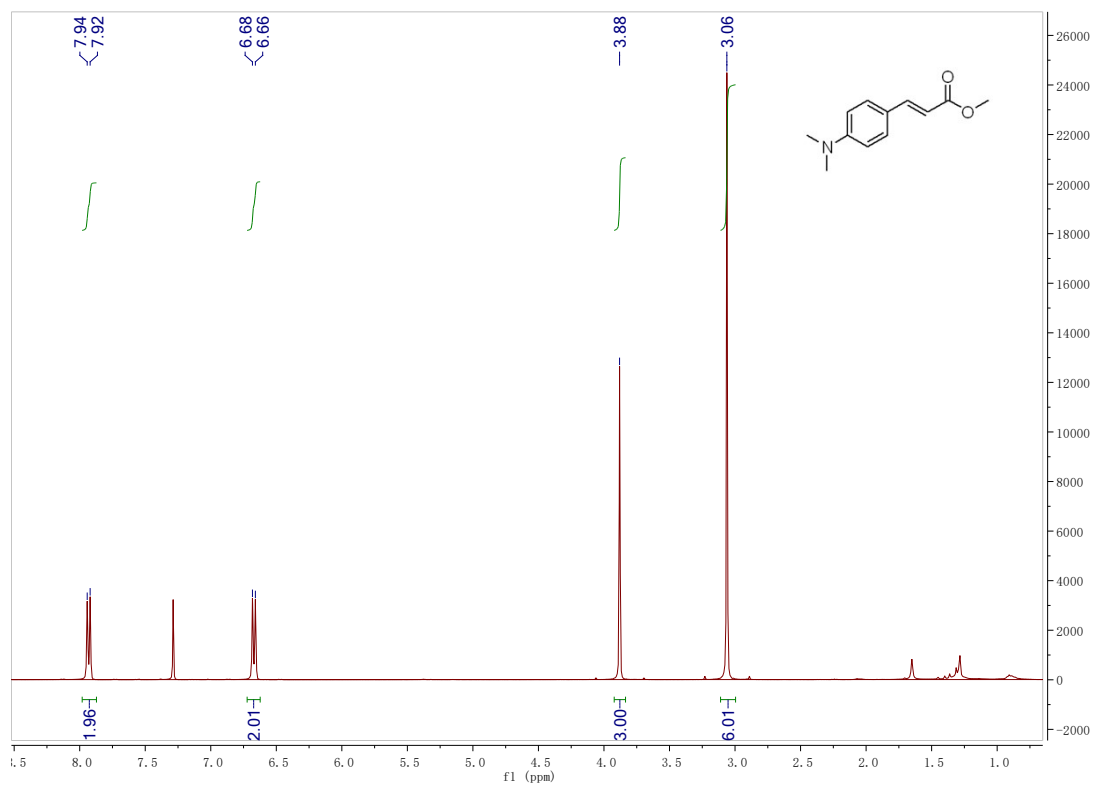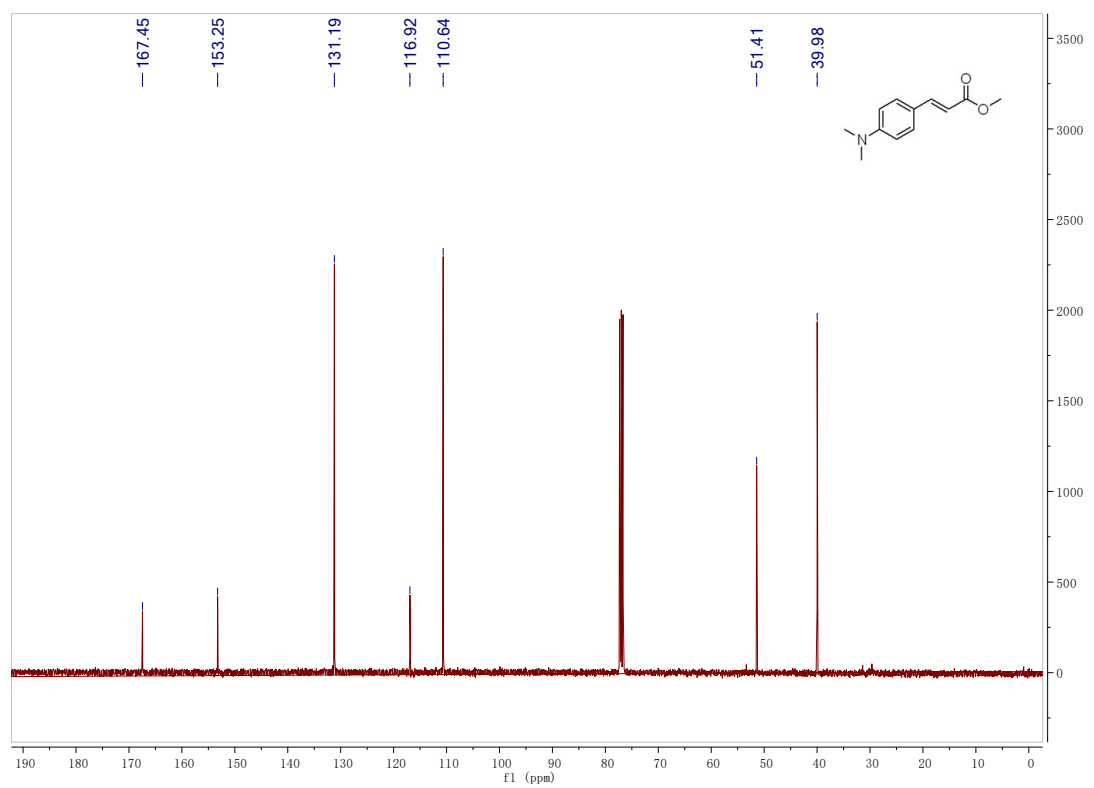



2g

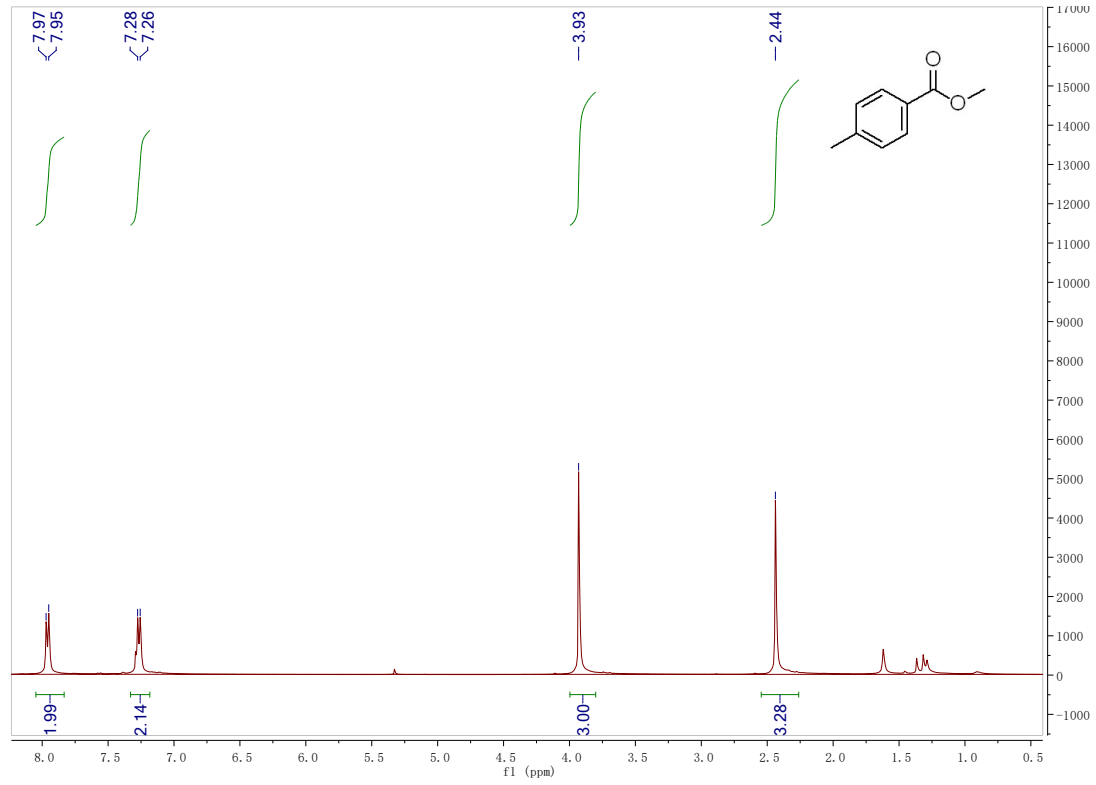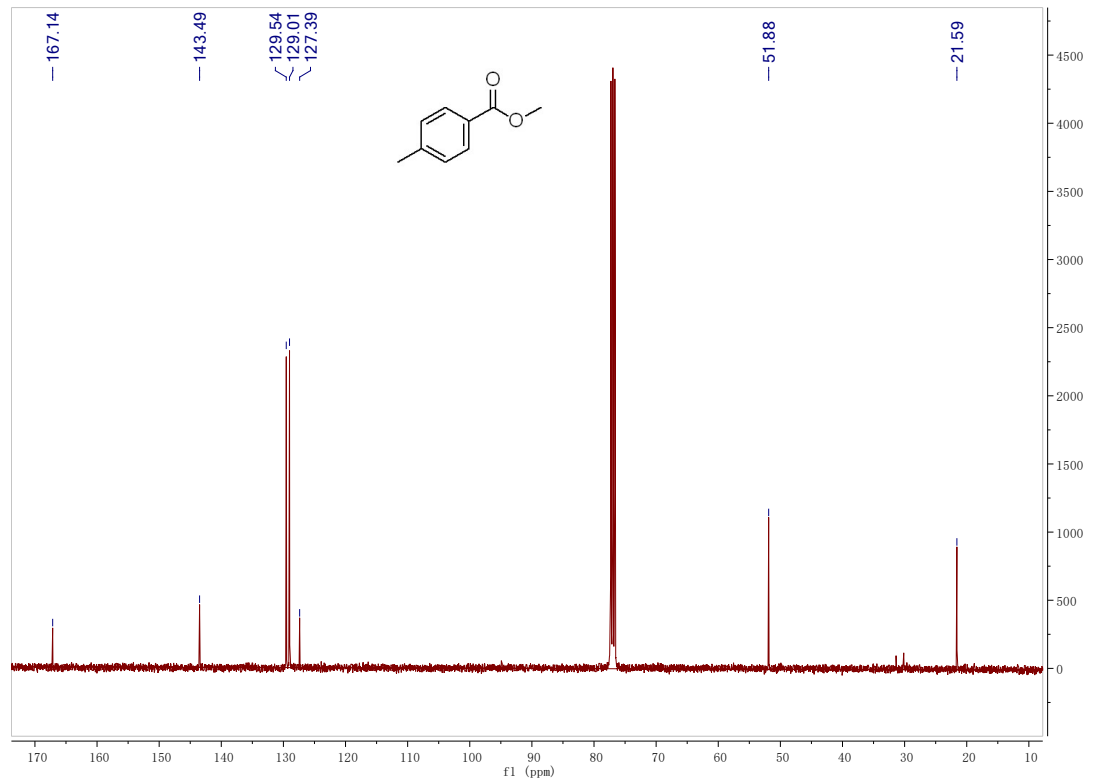

2h

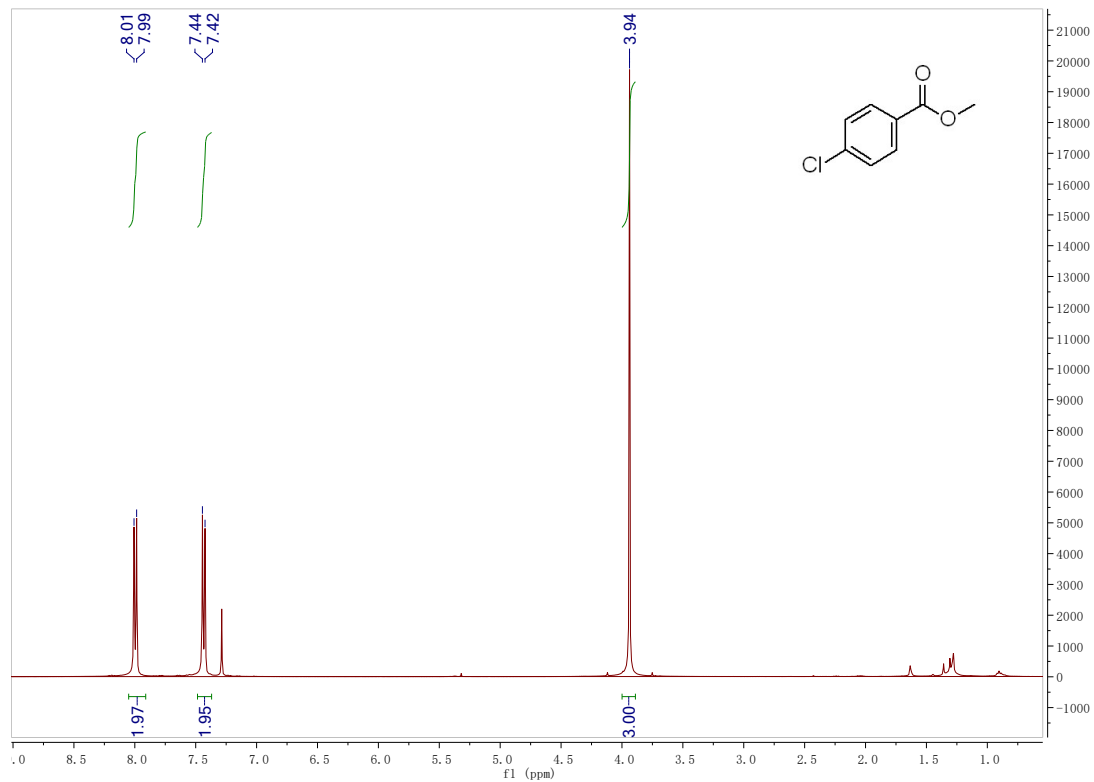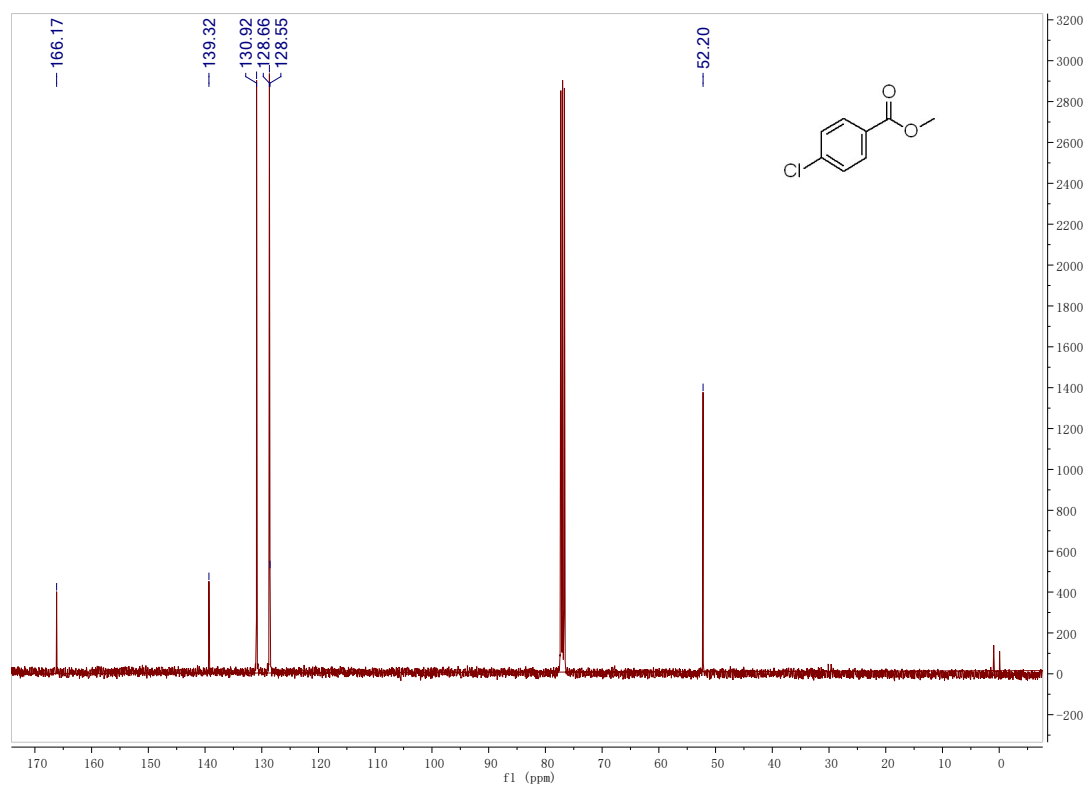

2i

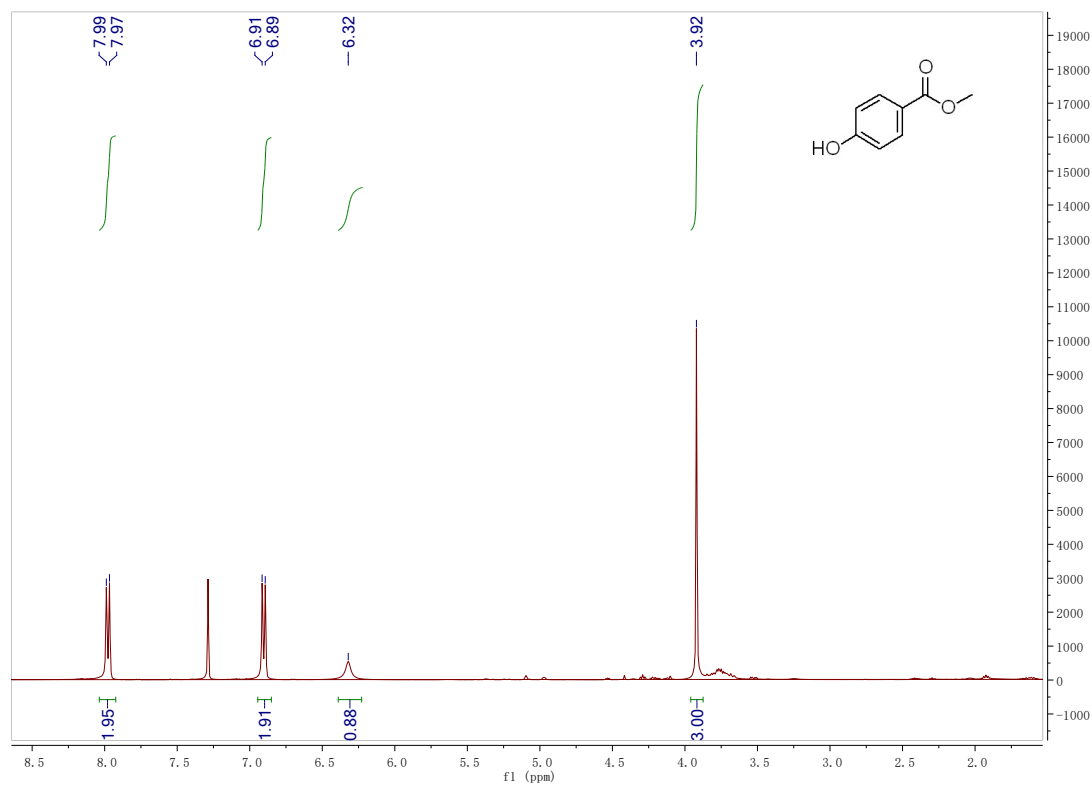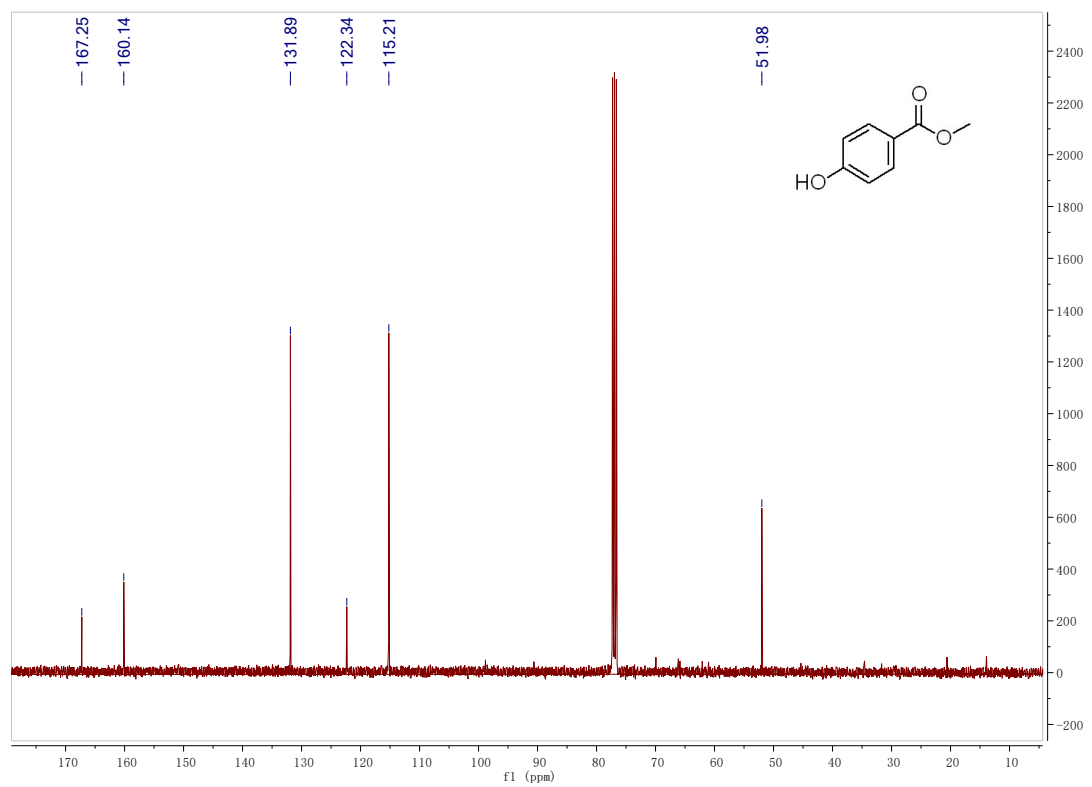

2j

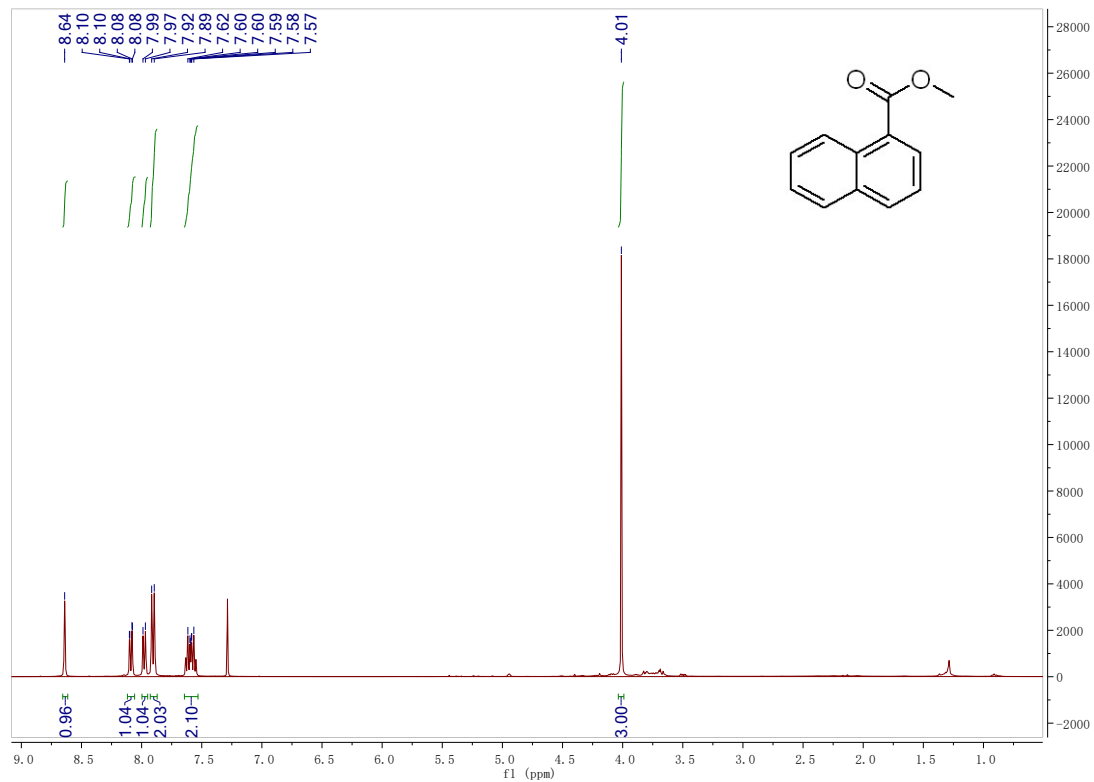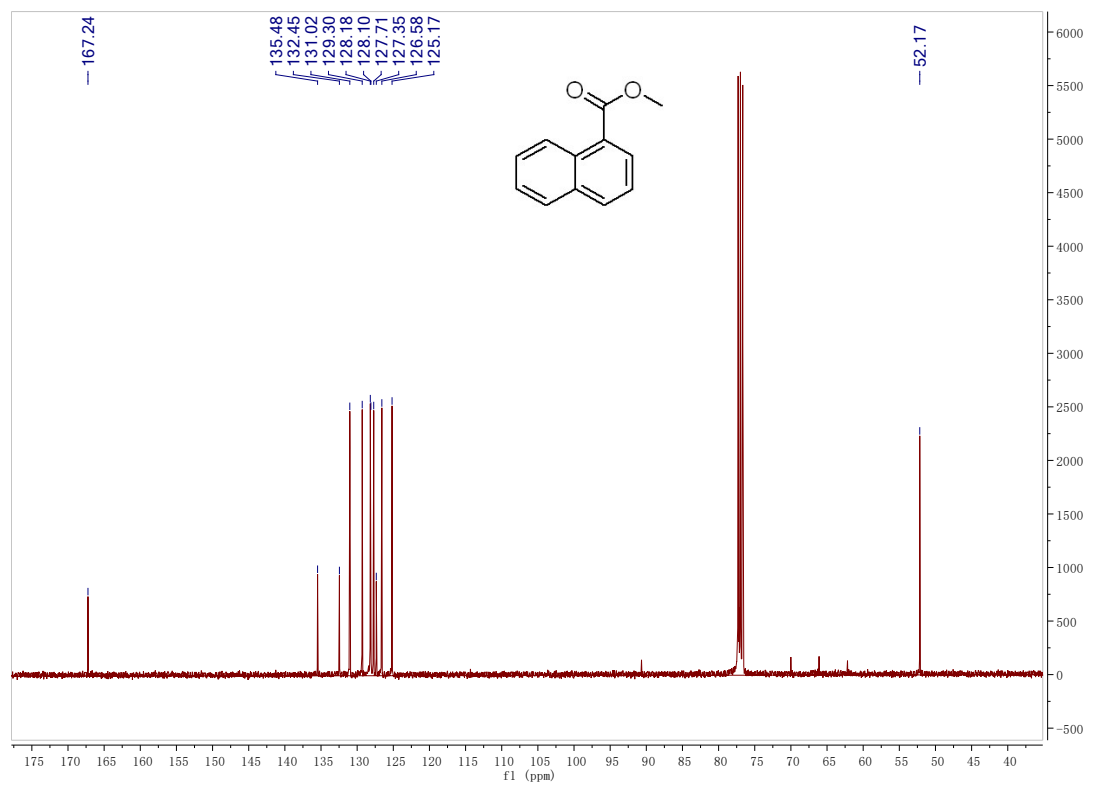

2k

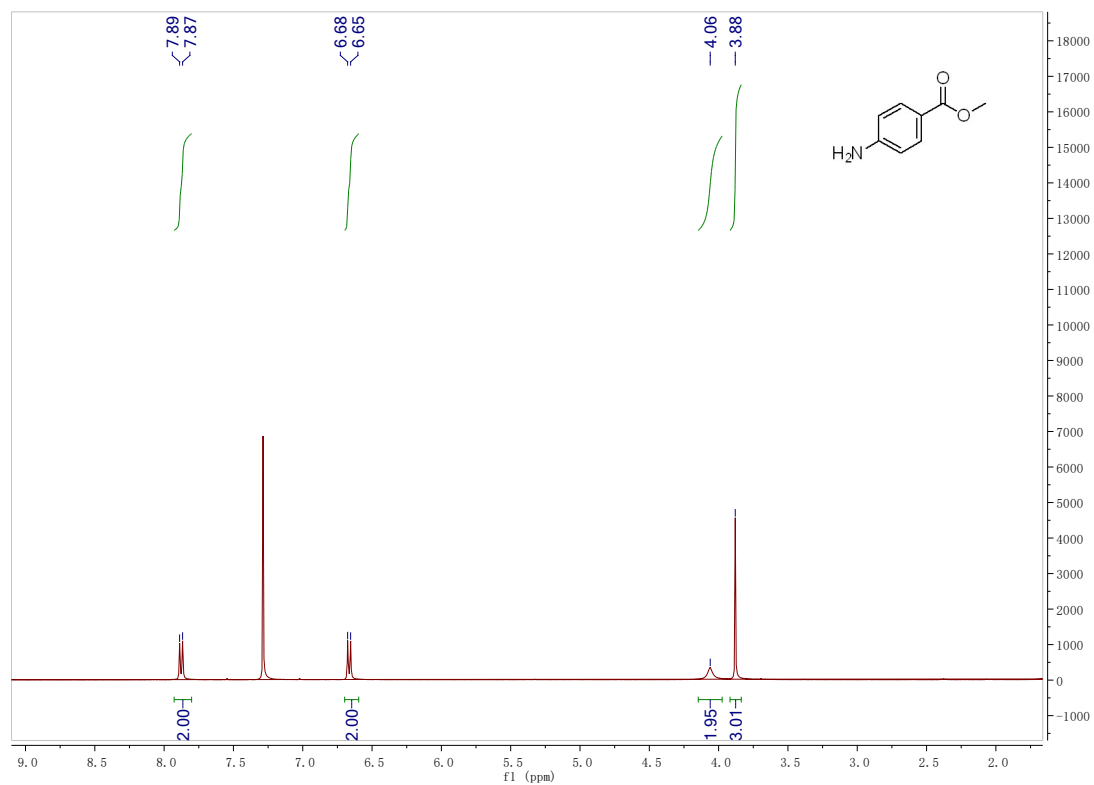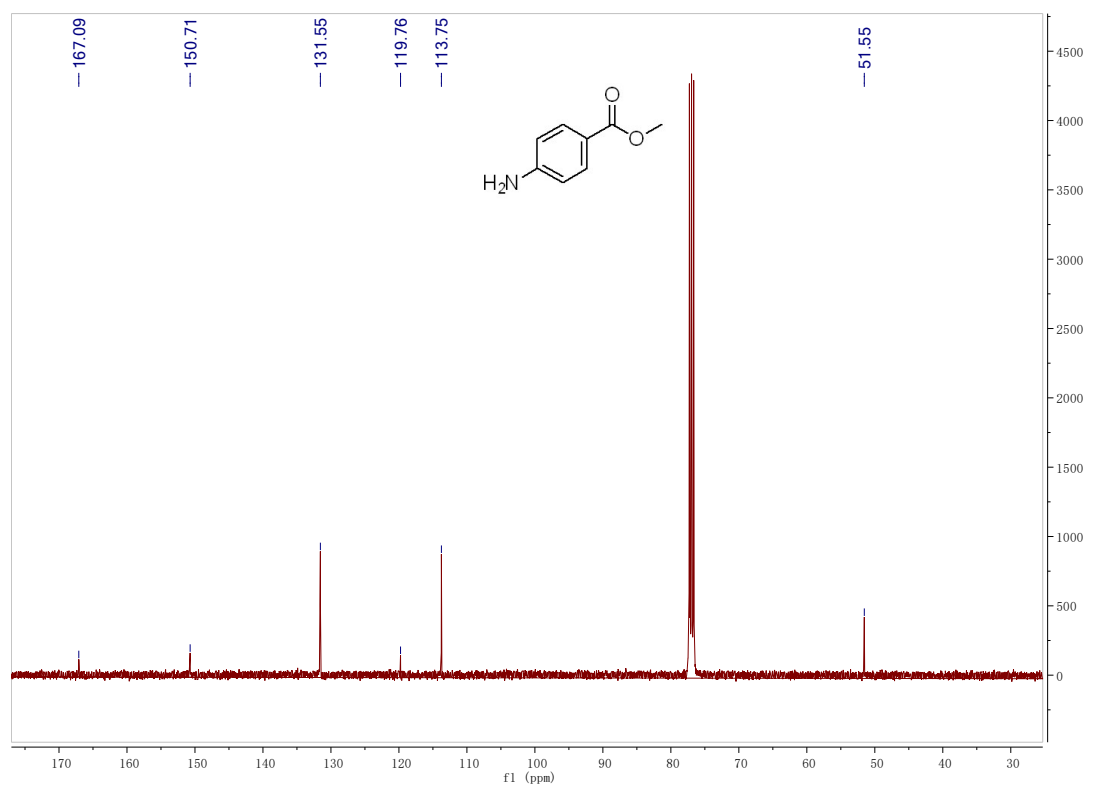

byproduct of 2k

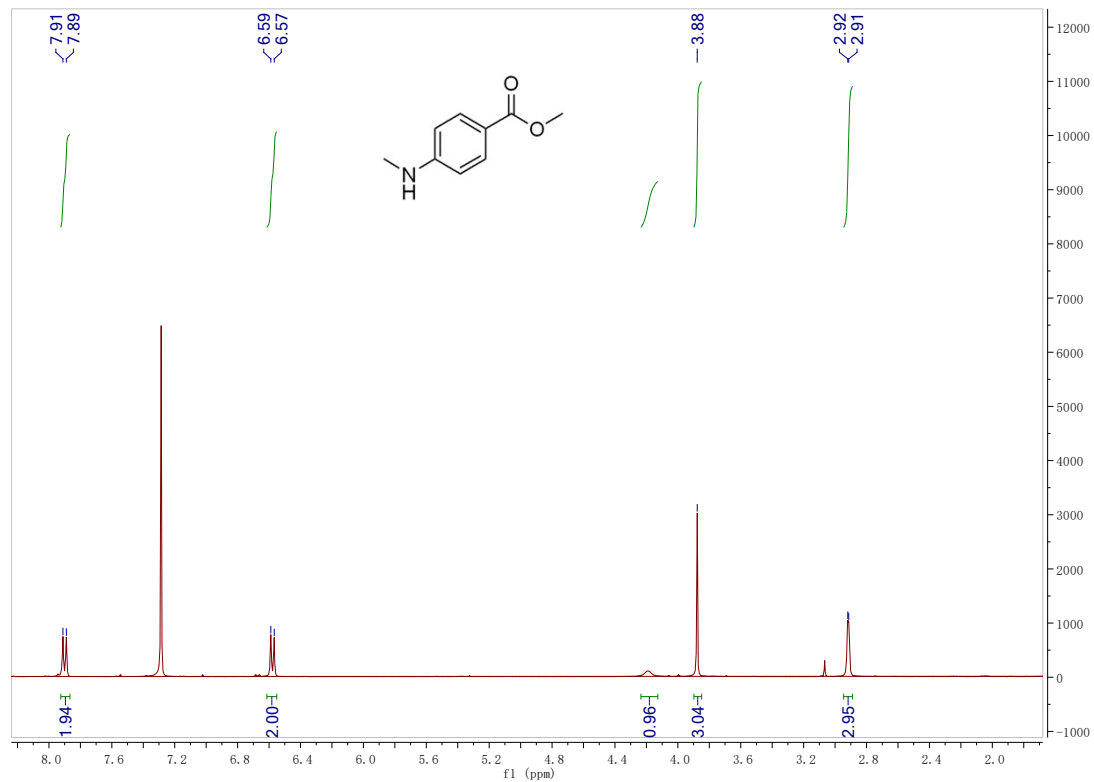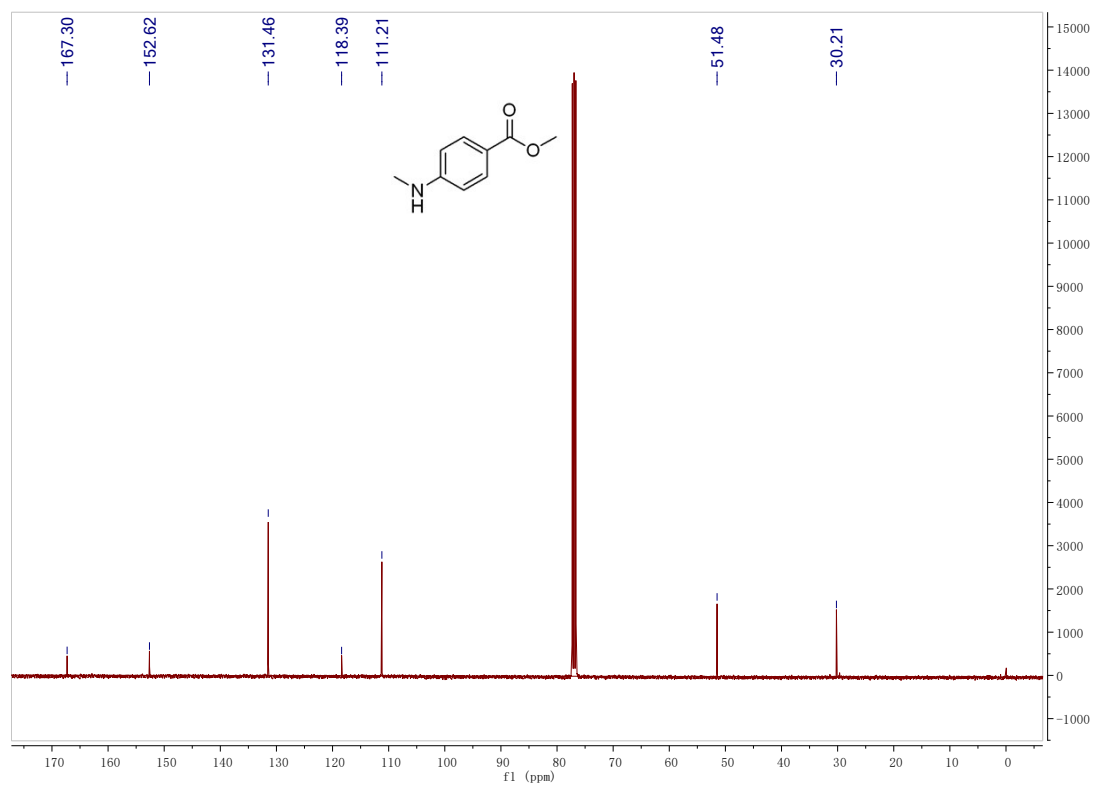

21

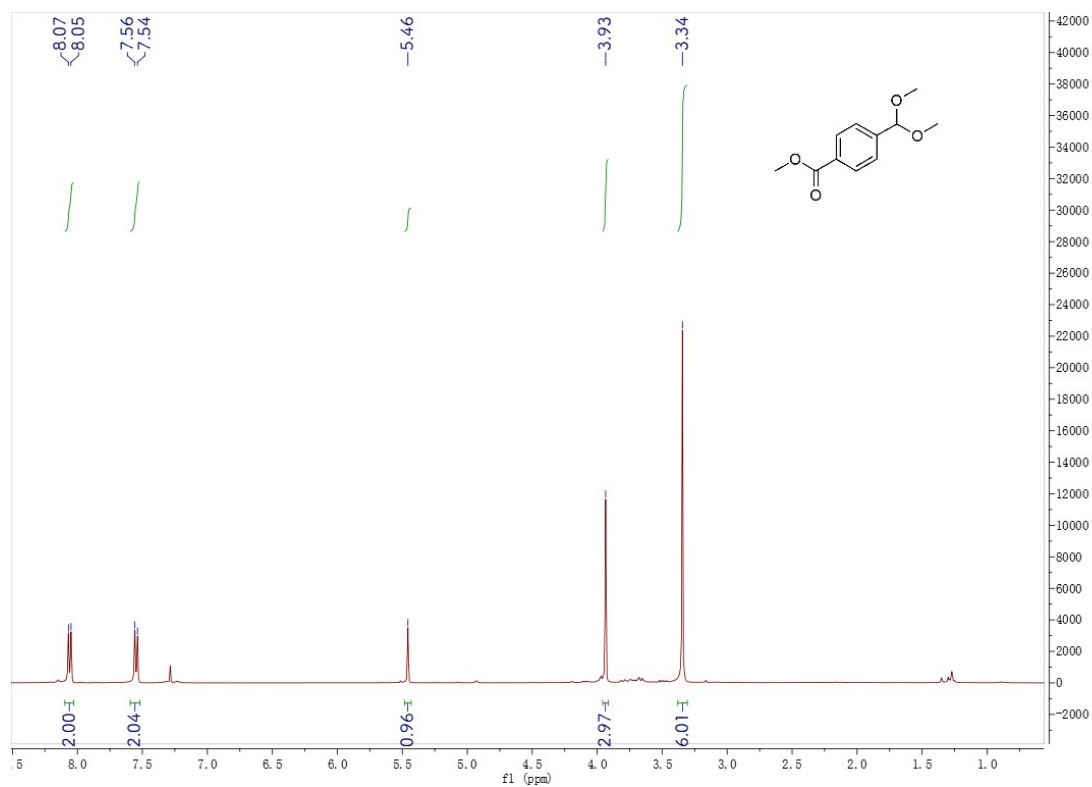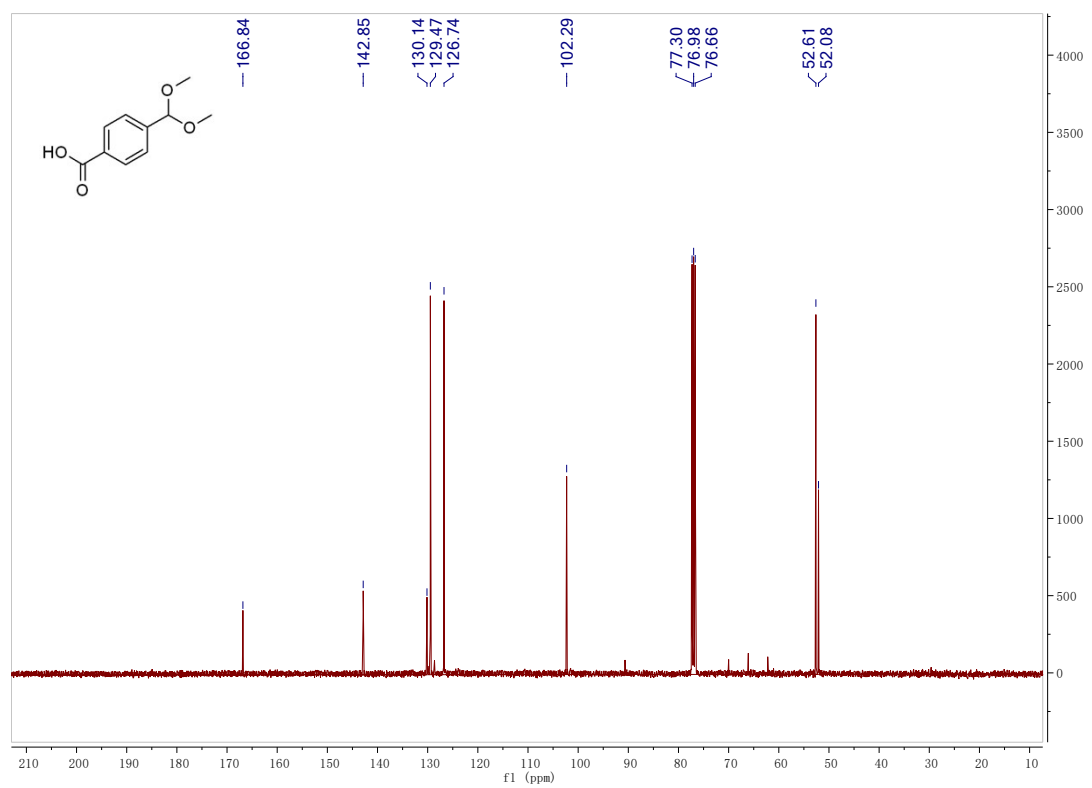

2m

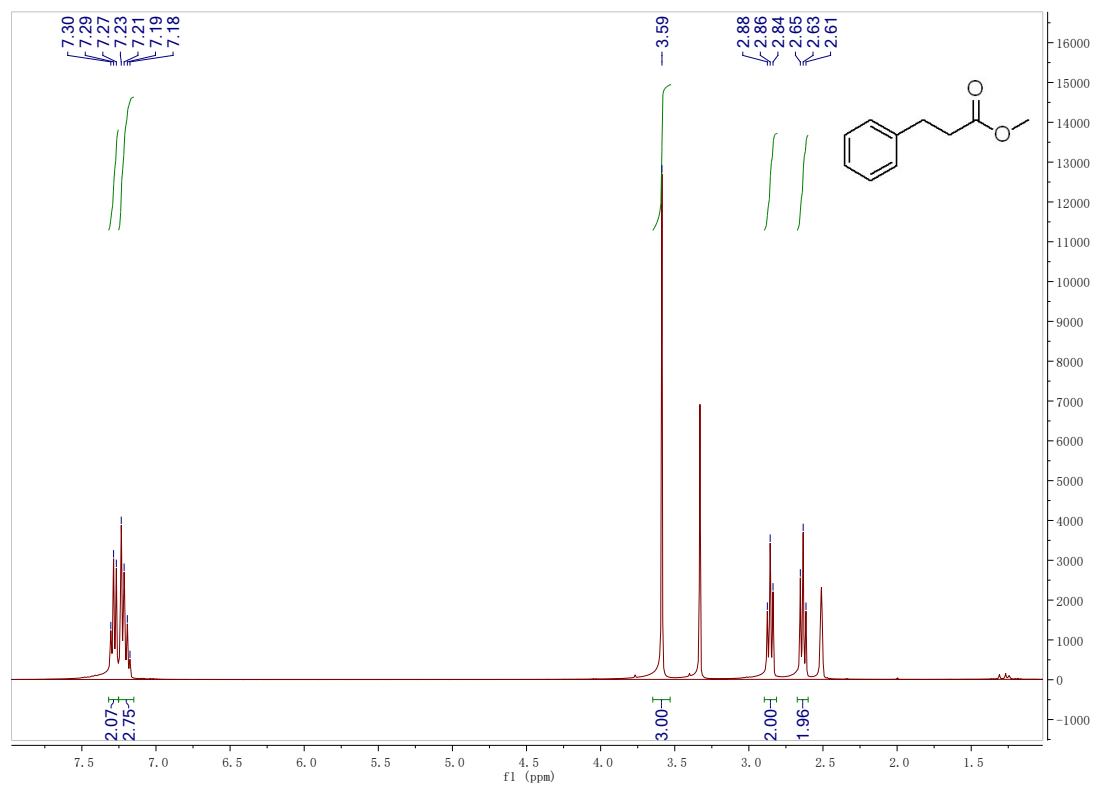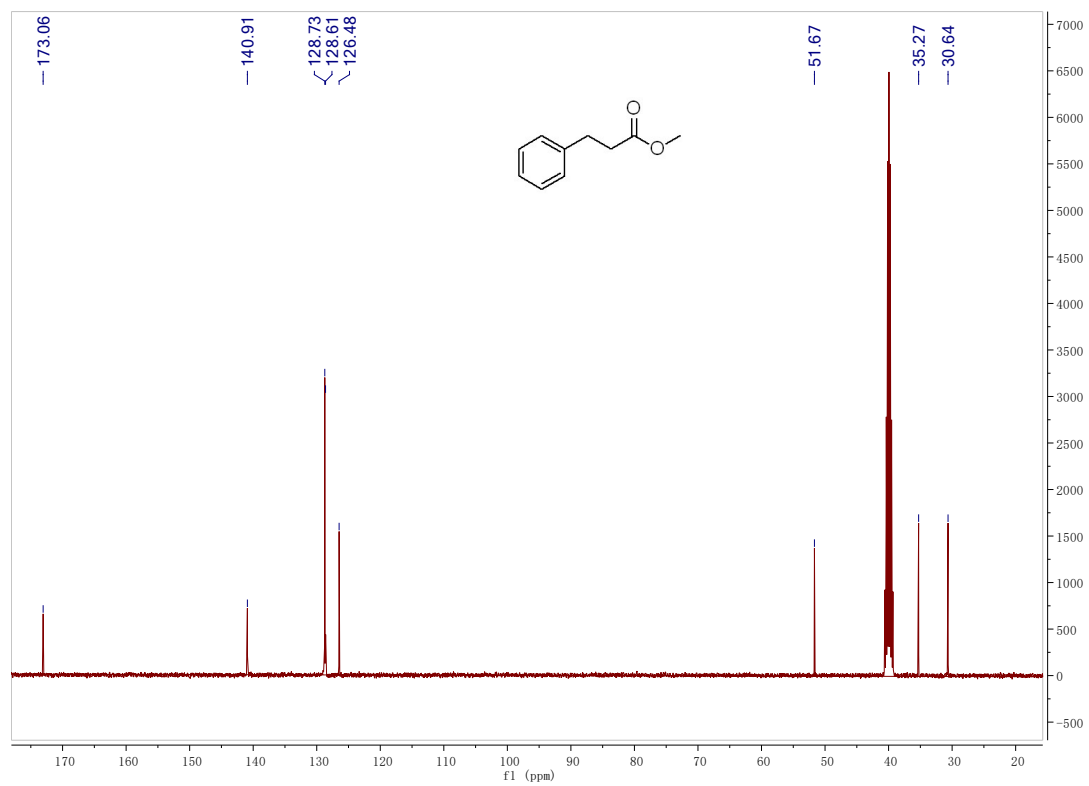



2n

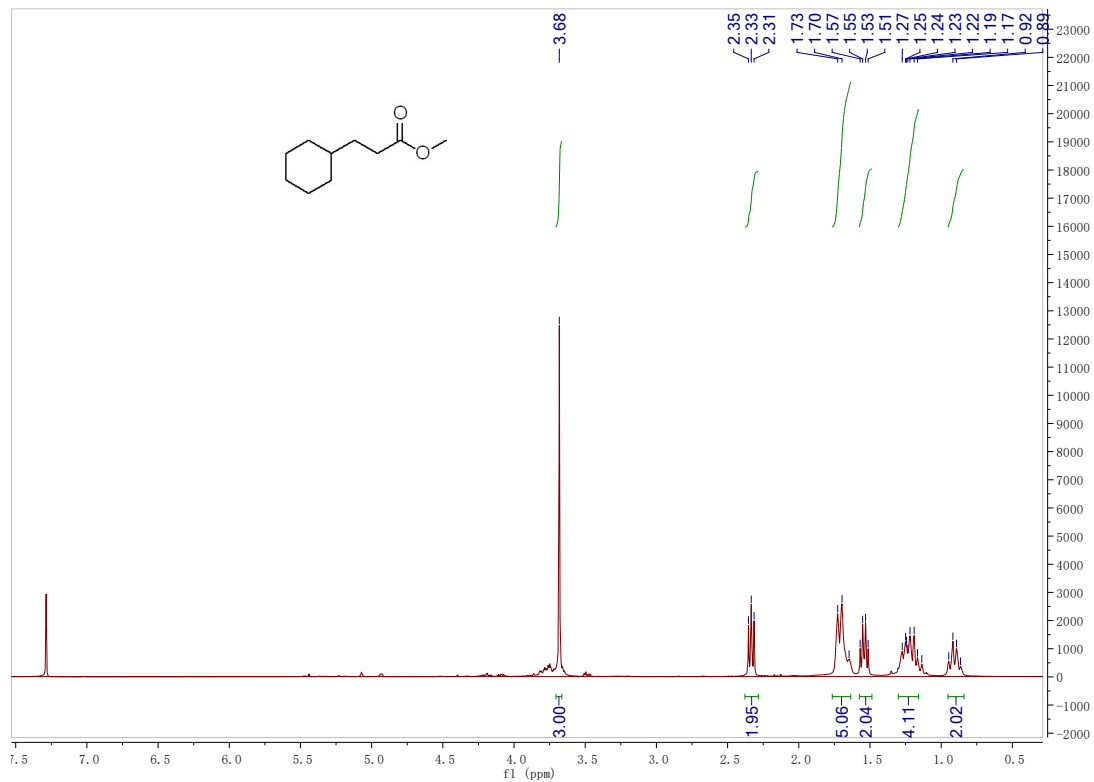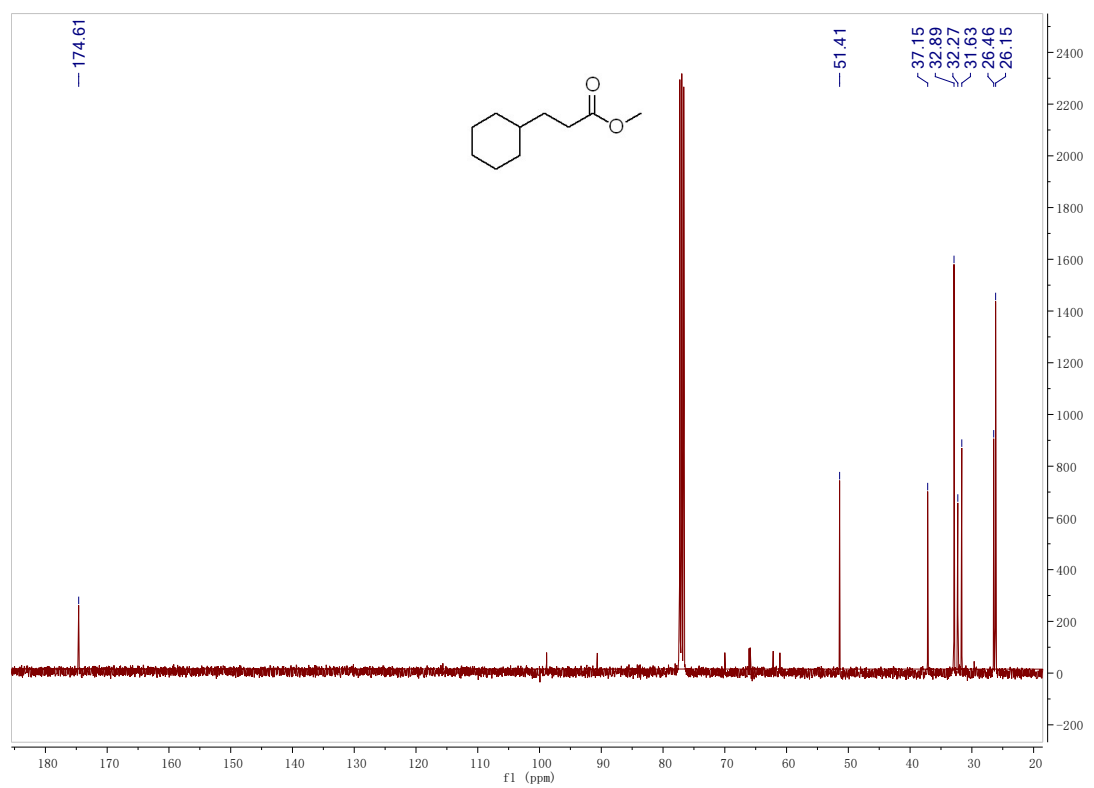

2o

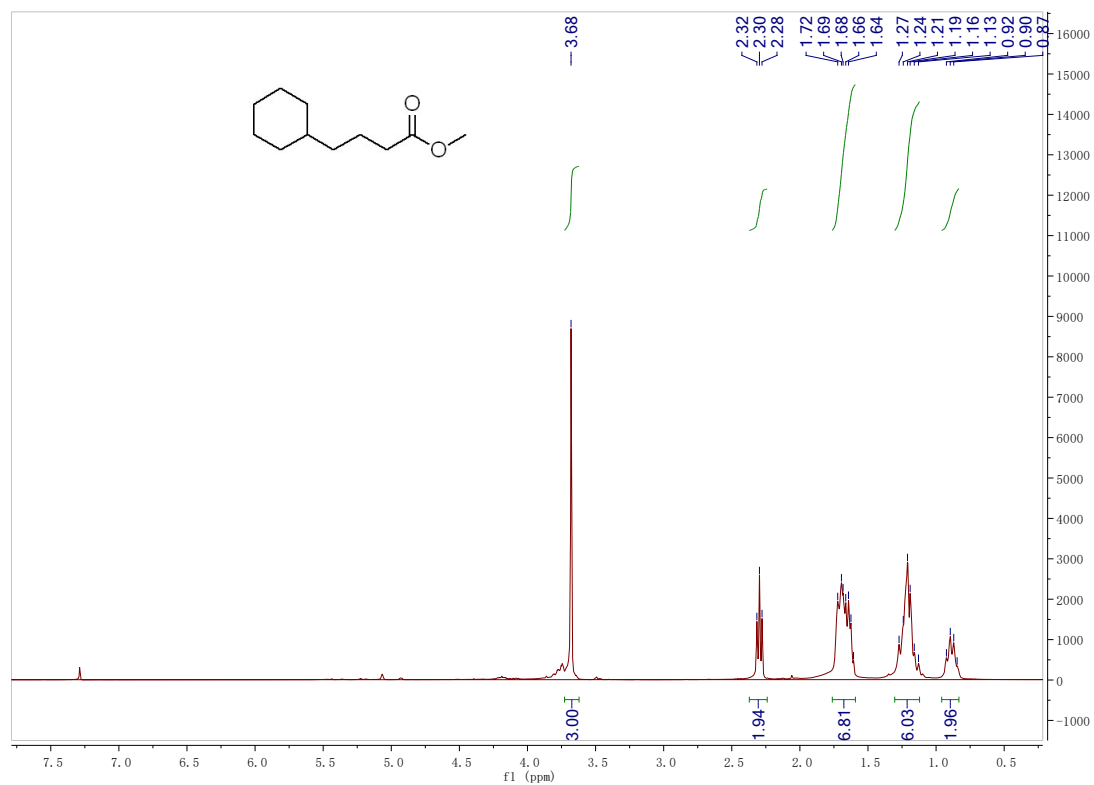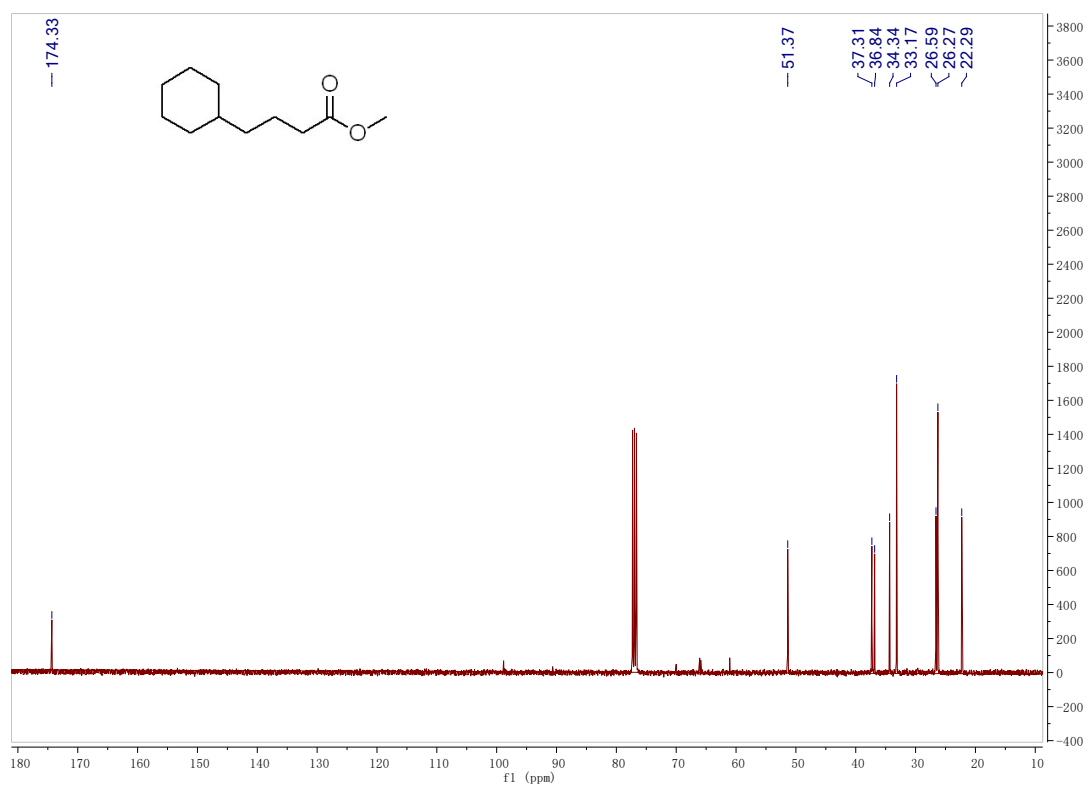

2p

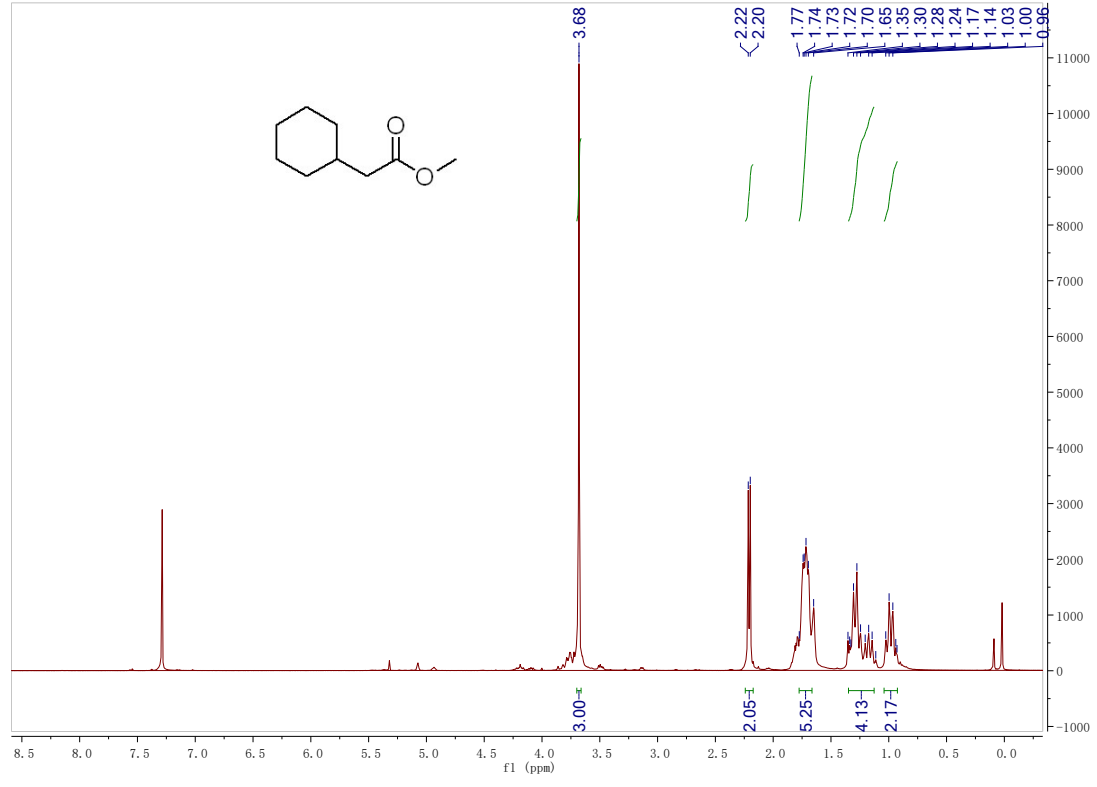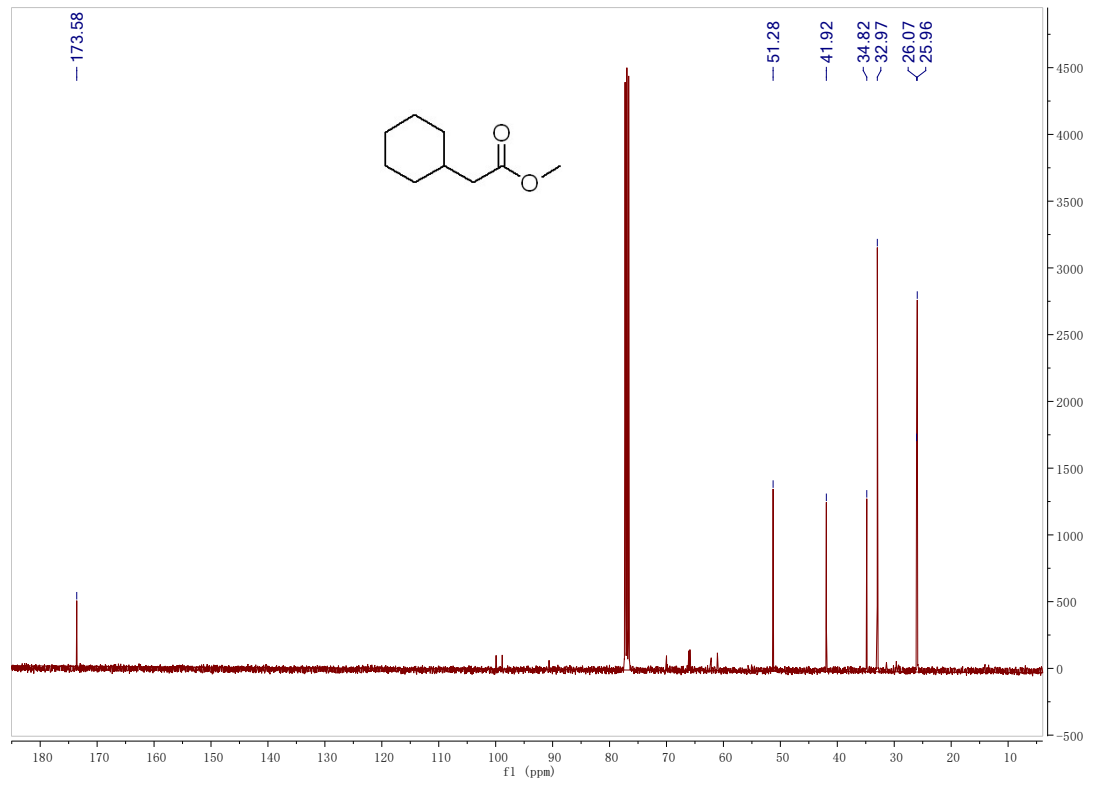

2q

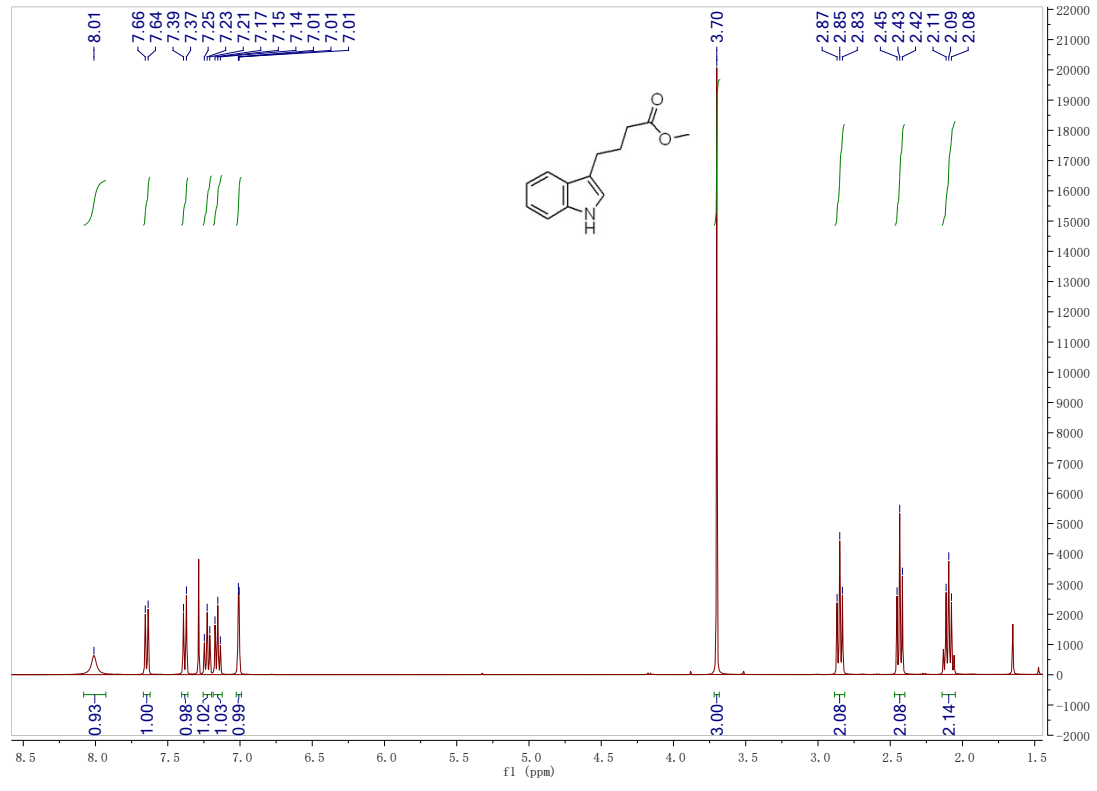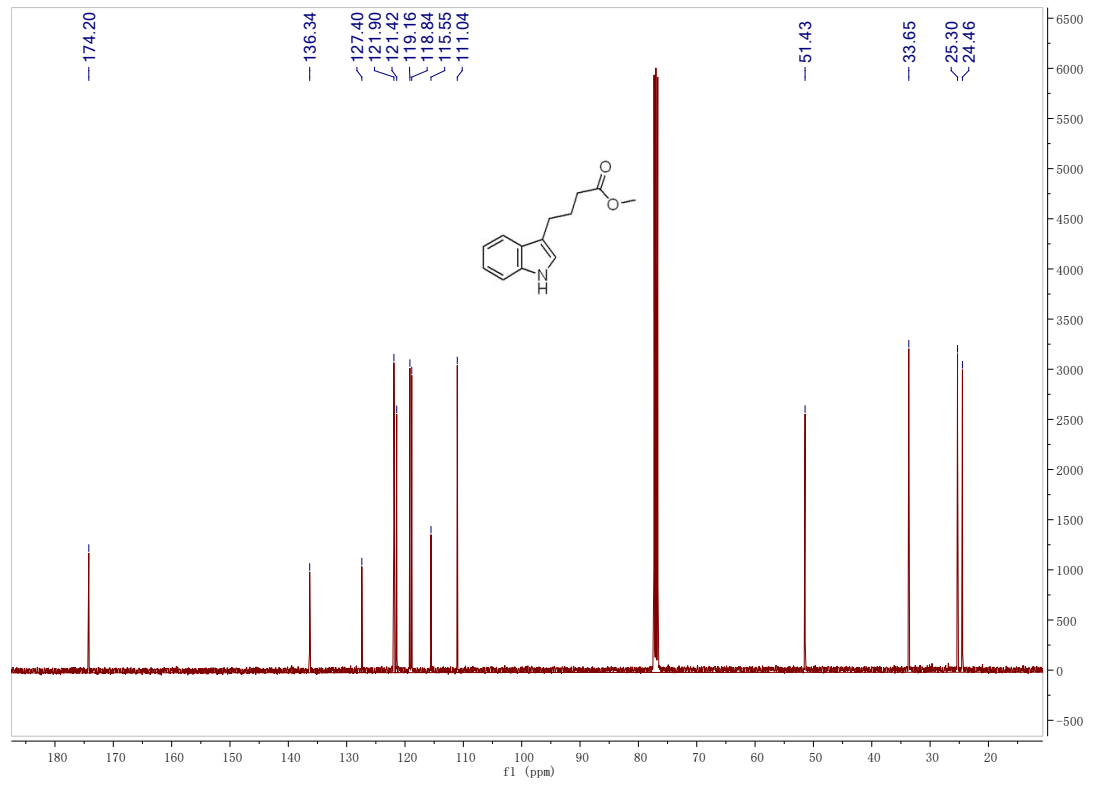

2r

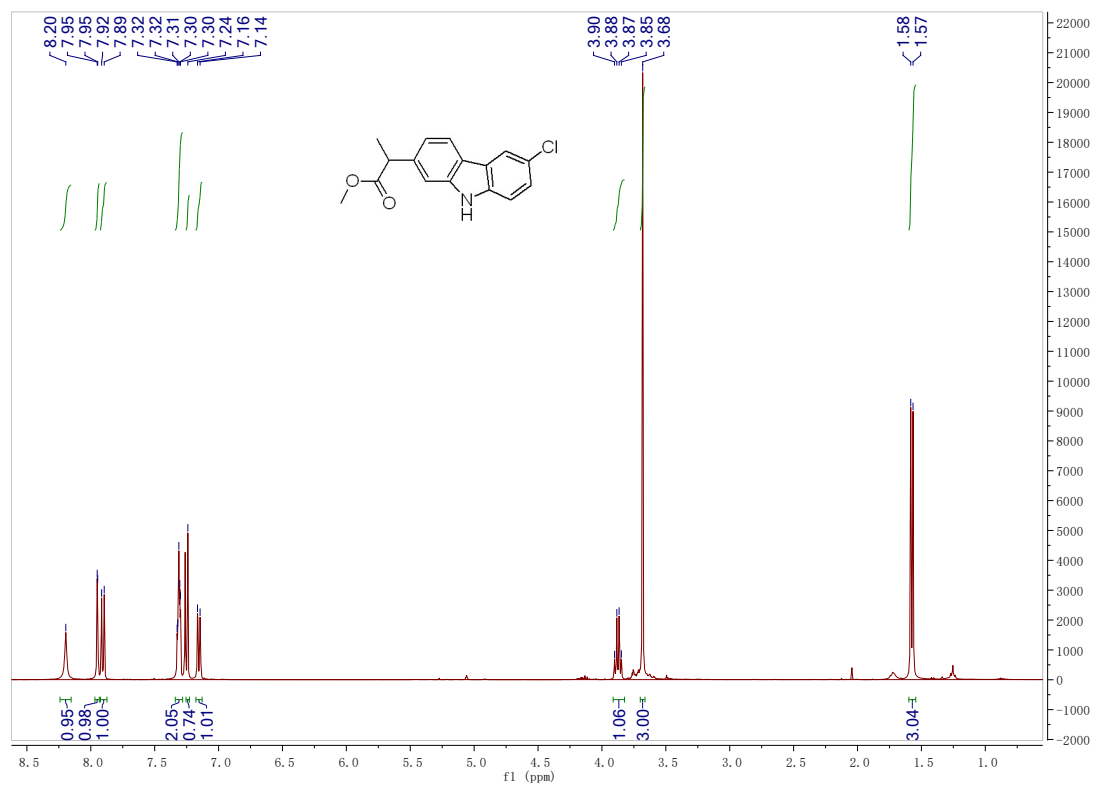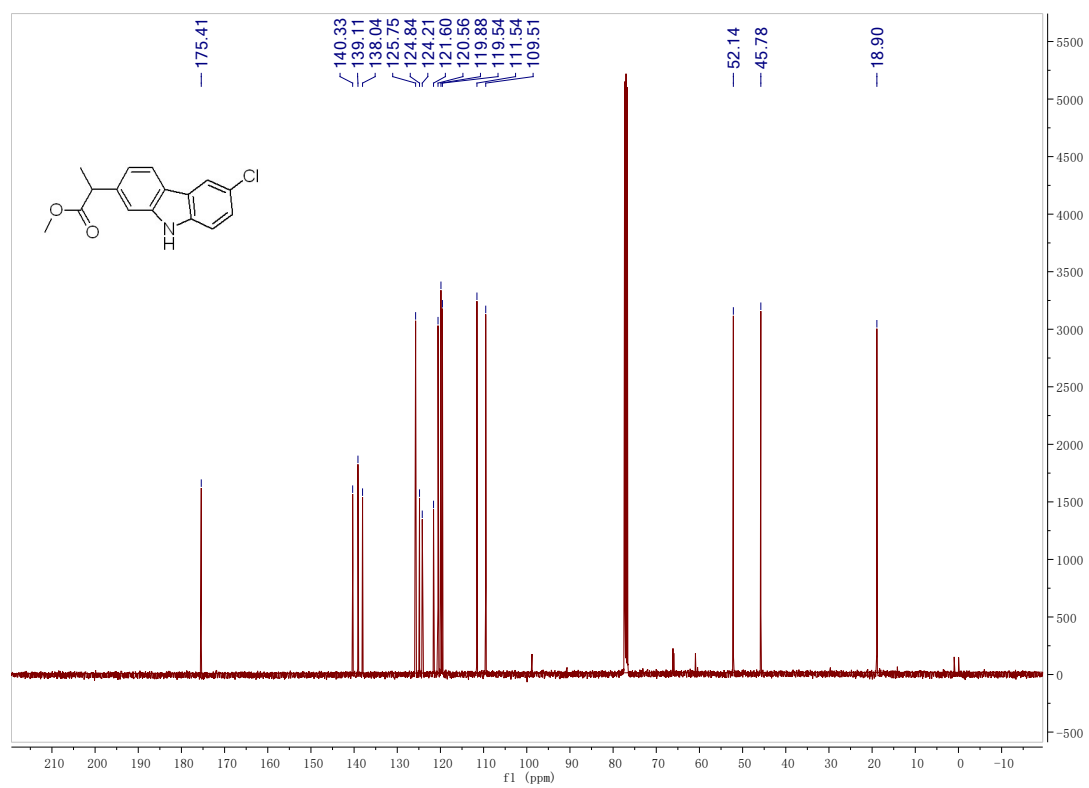

2s

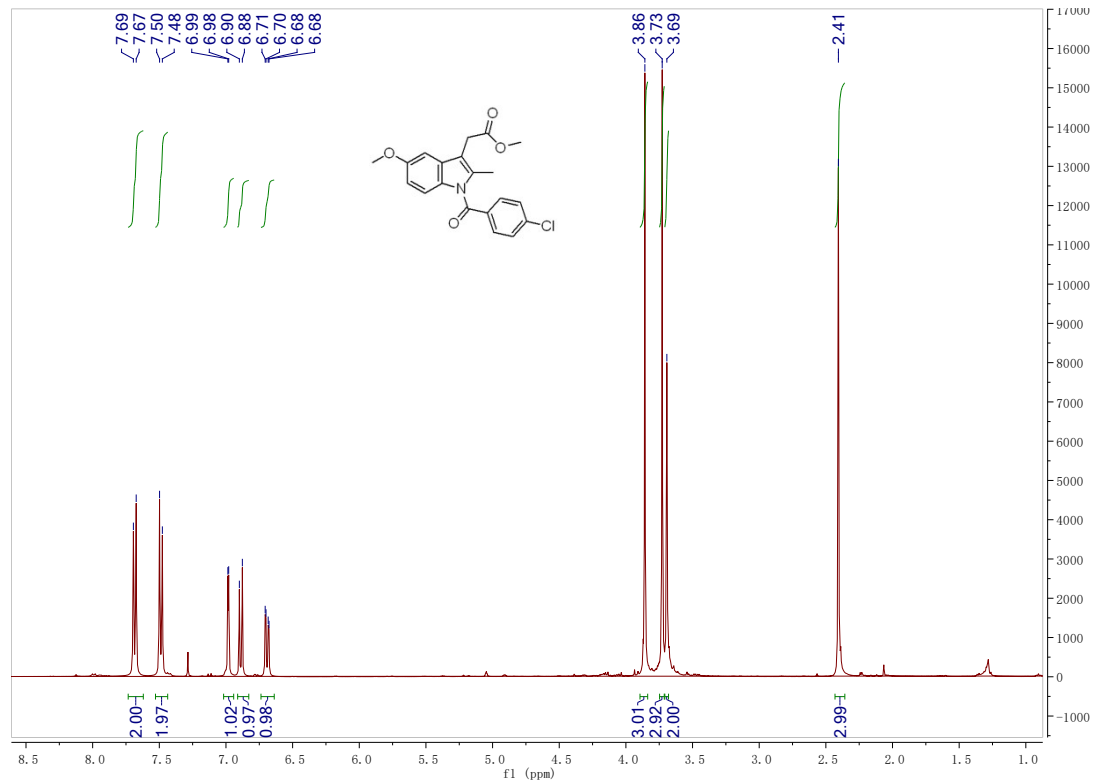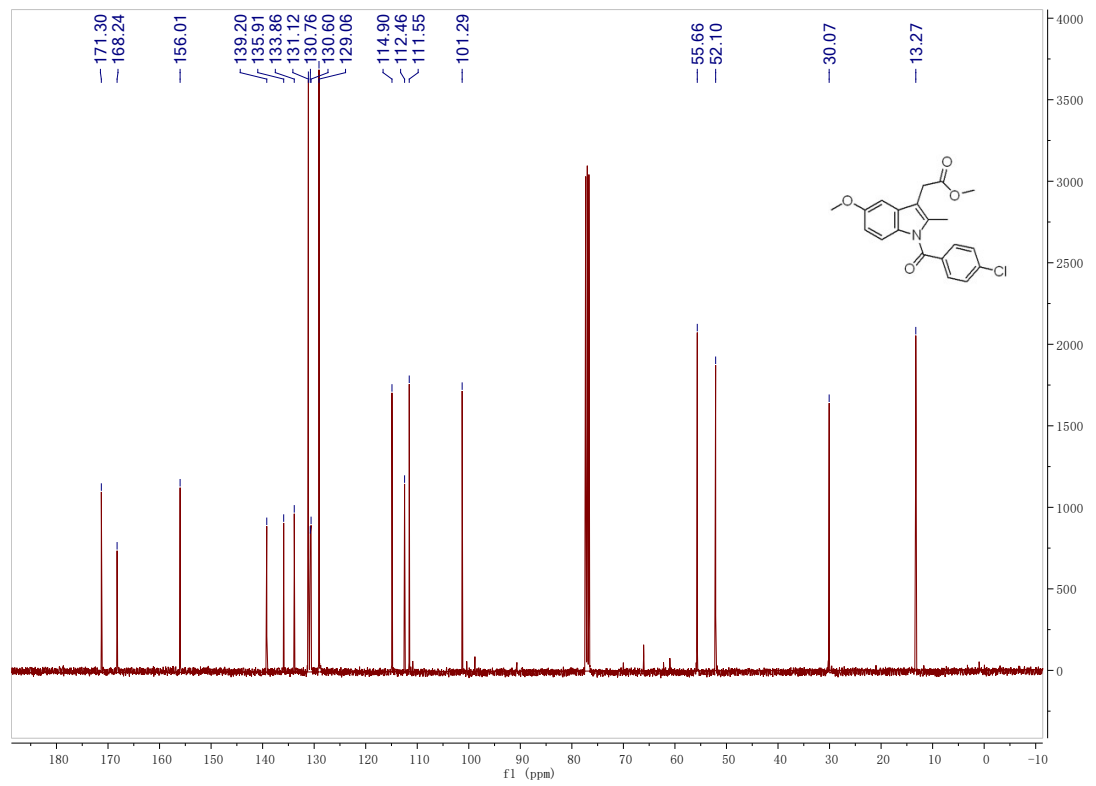

2t

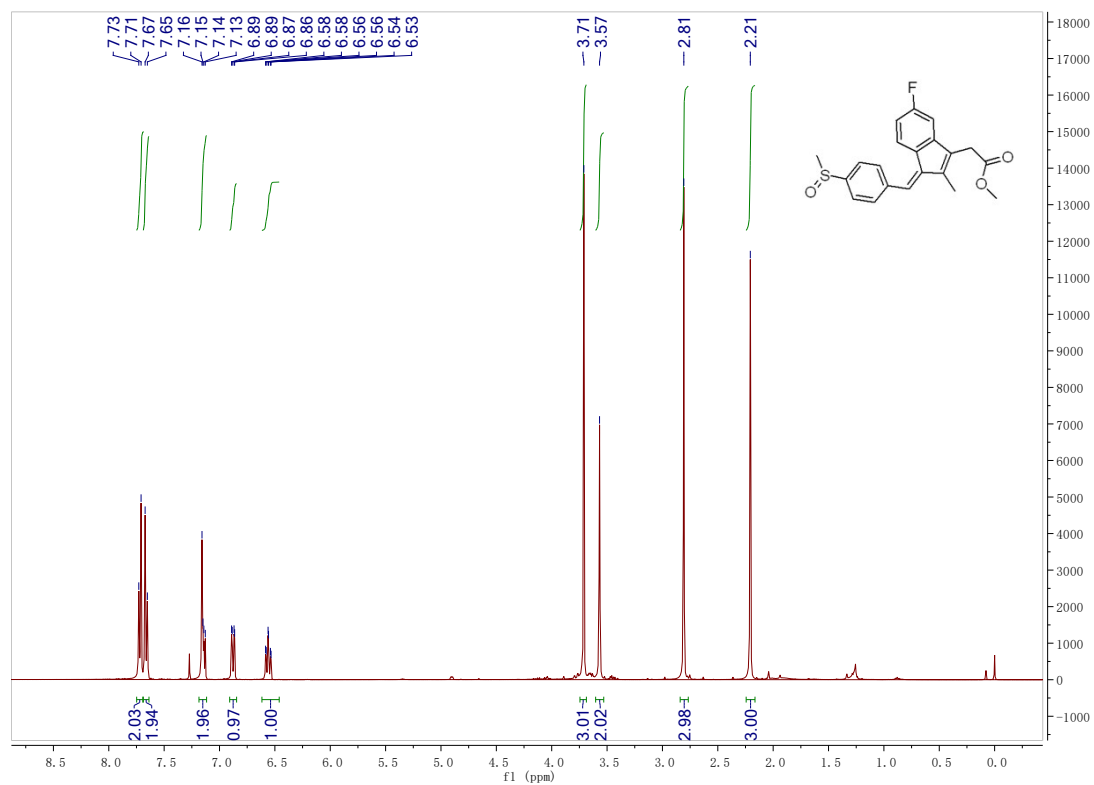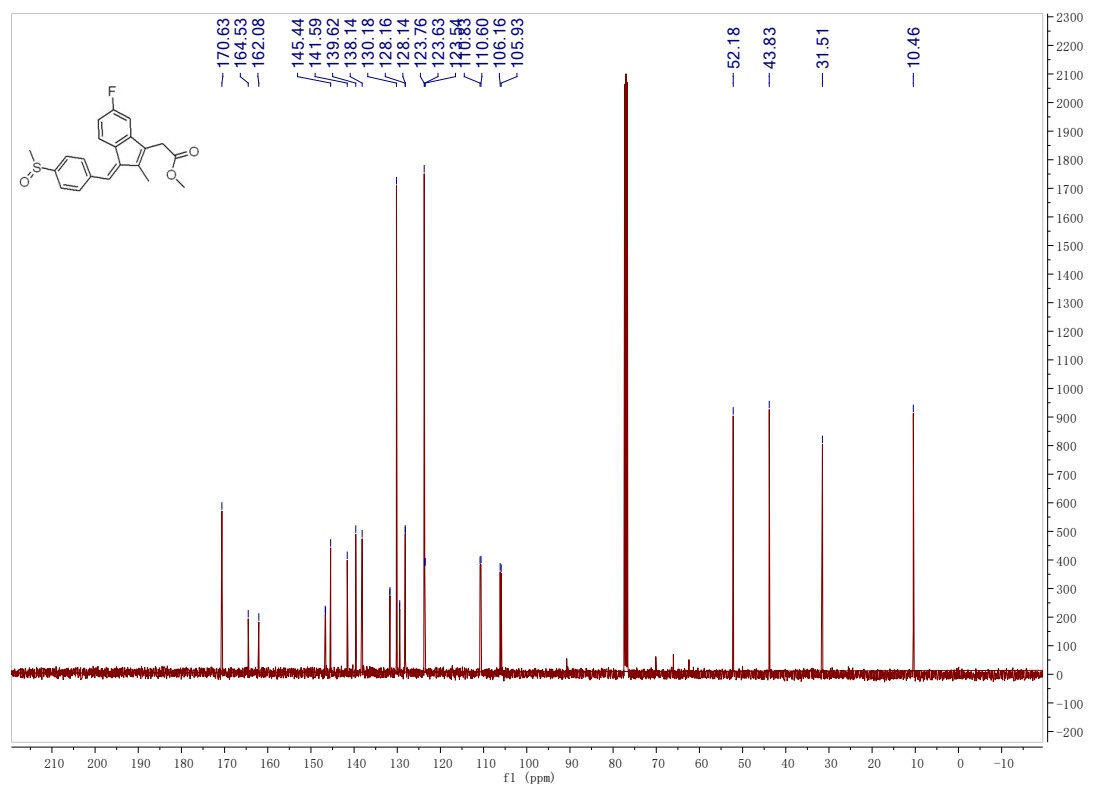

2u

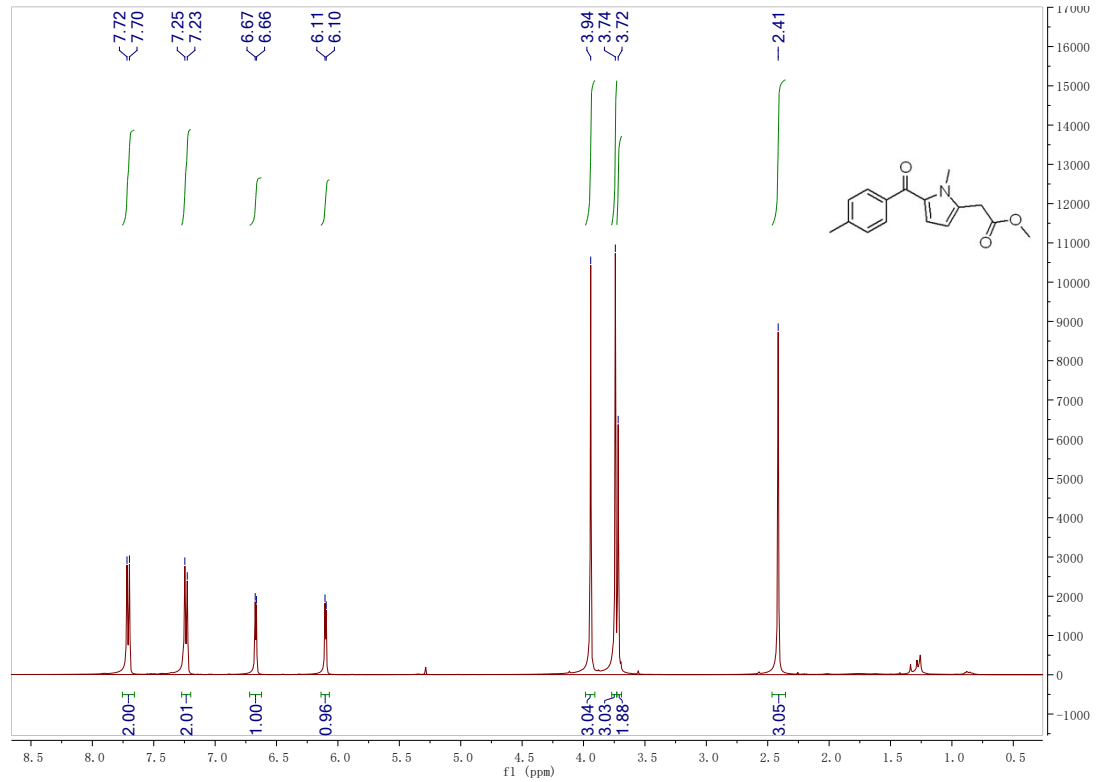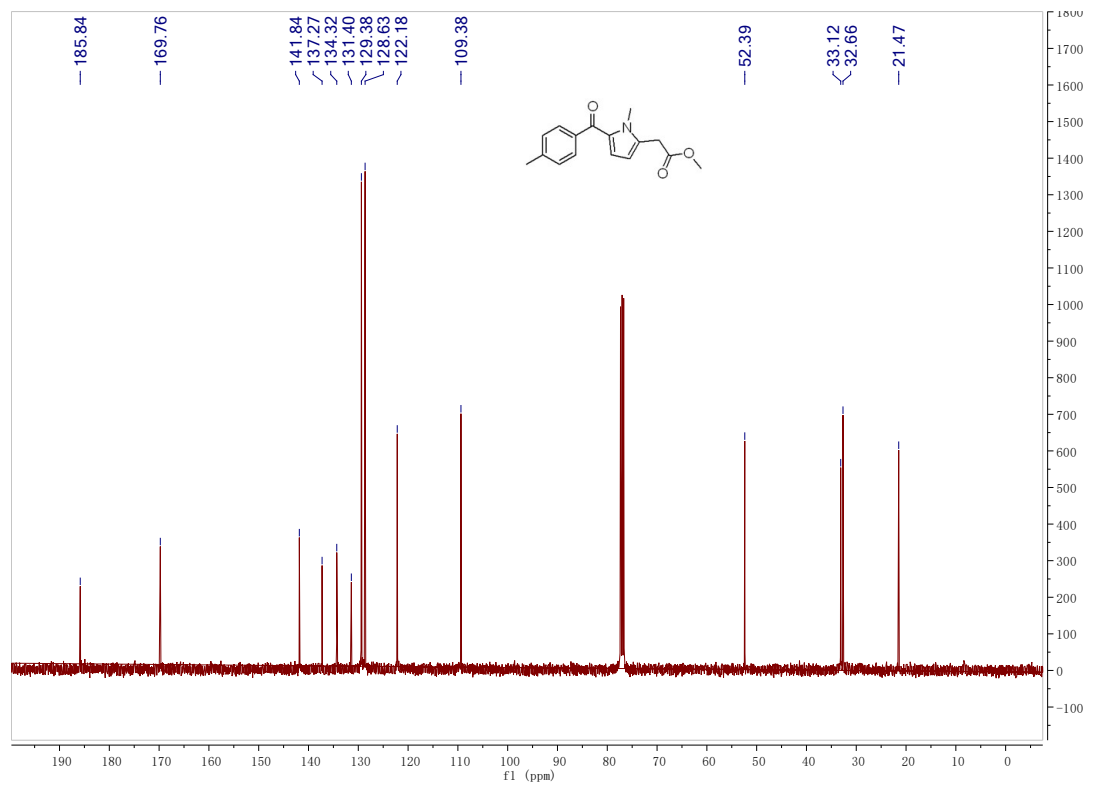



2v

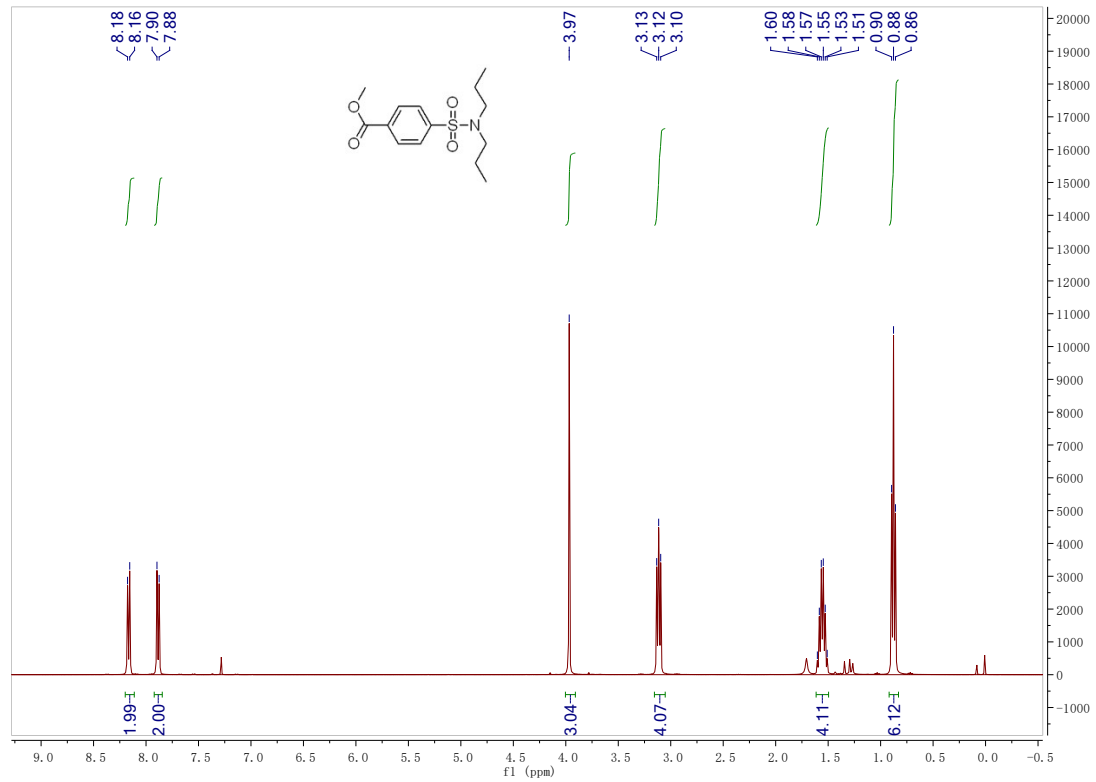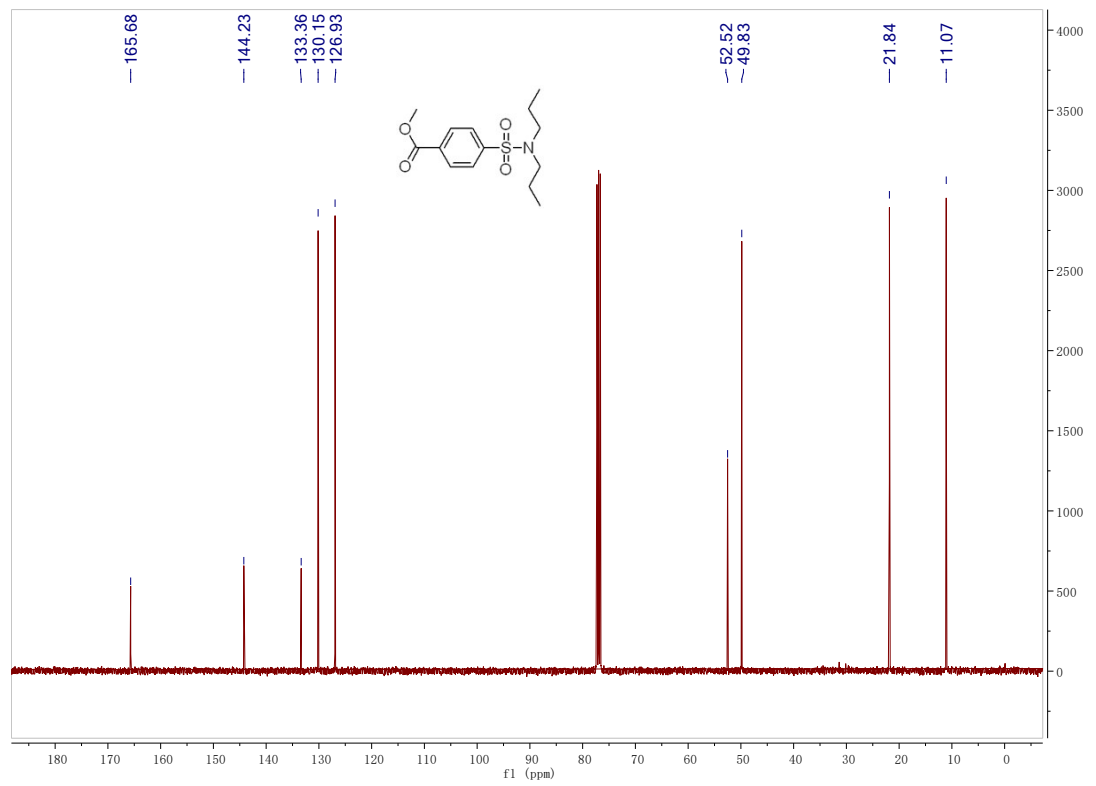

2w

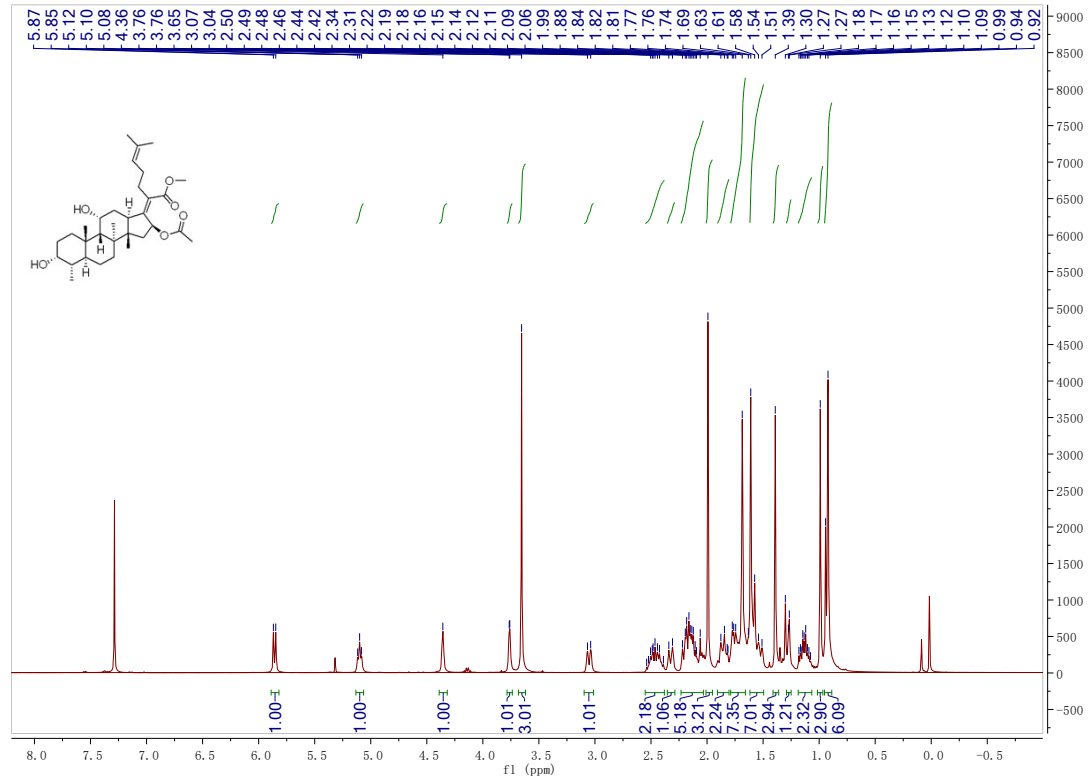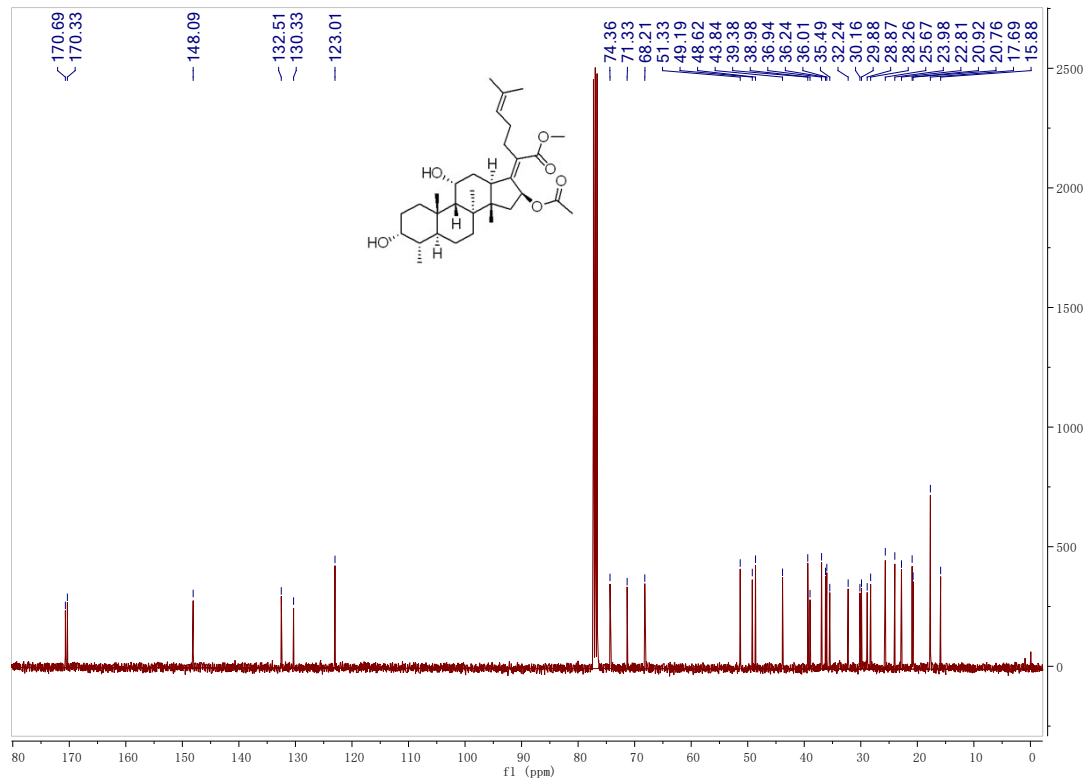

2x

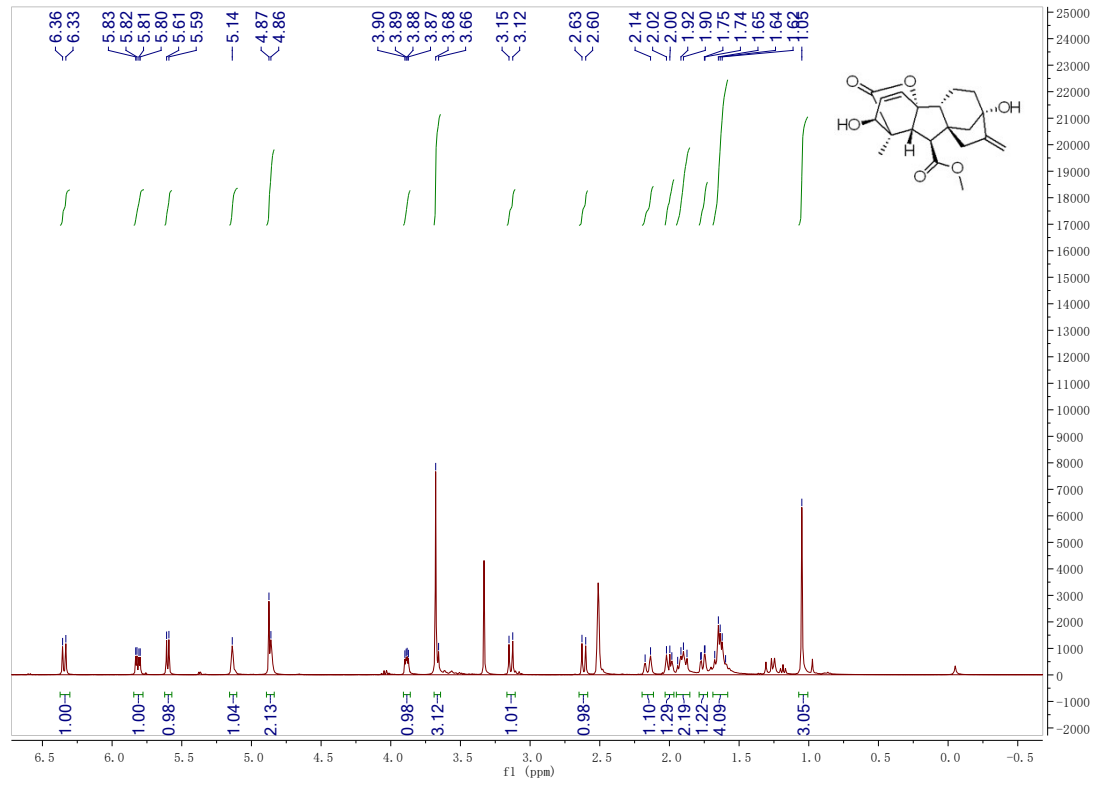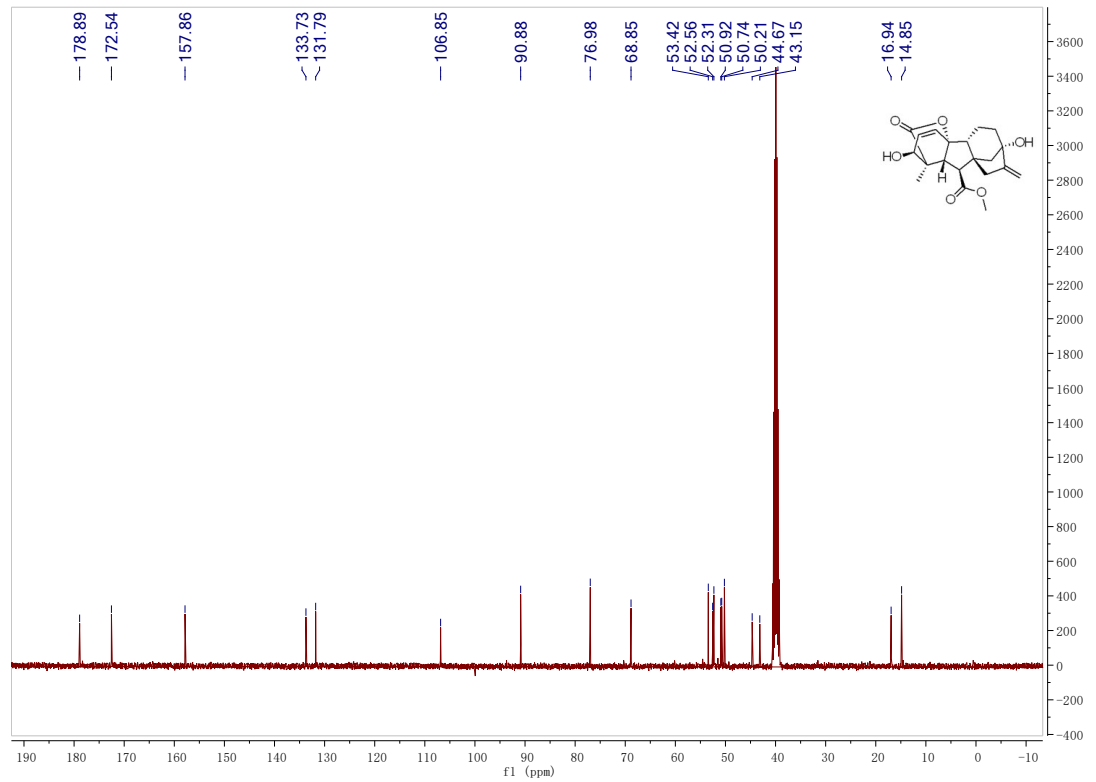

2y

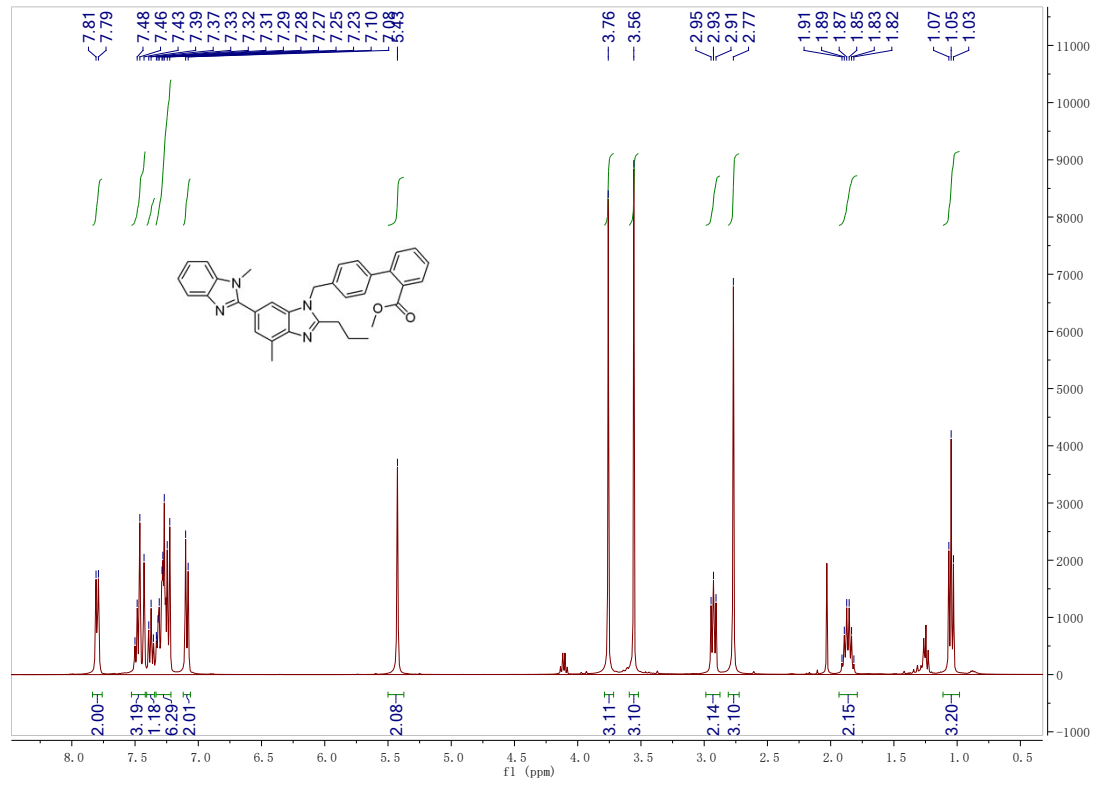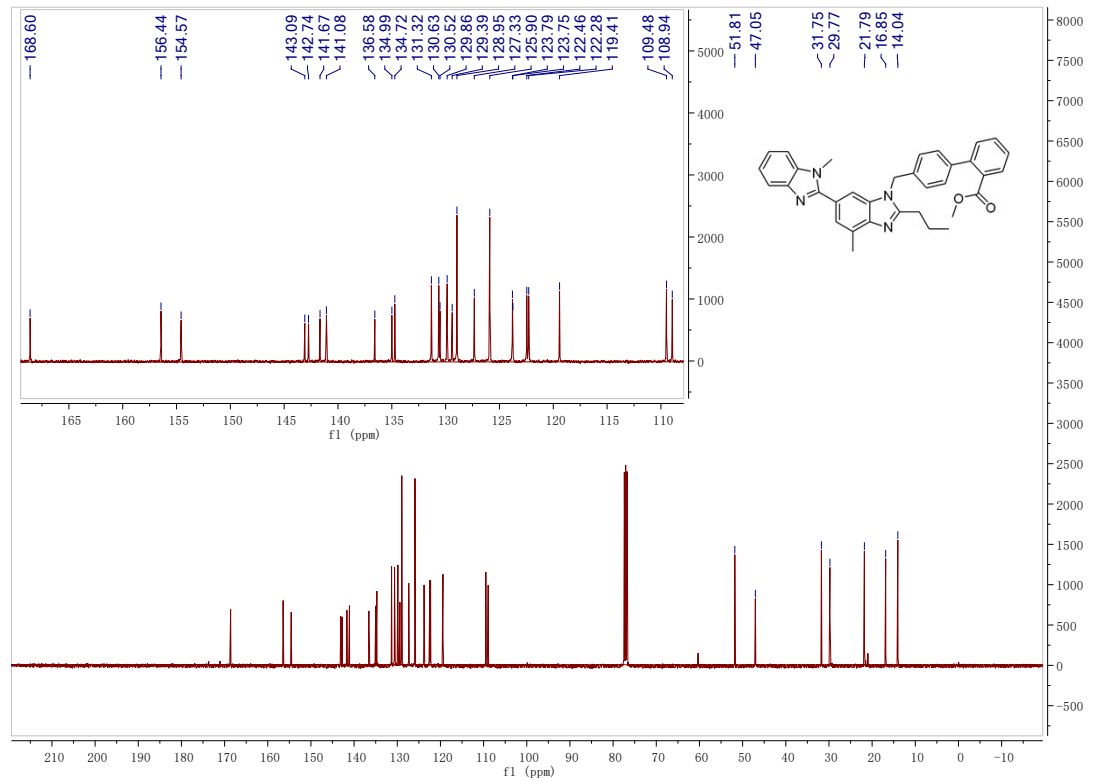

4a

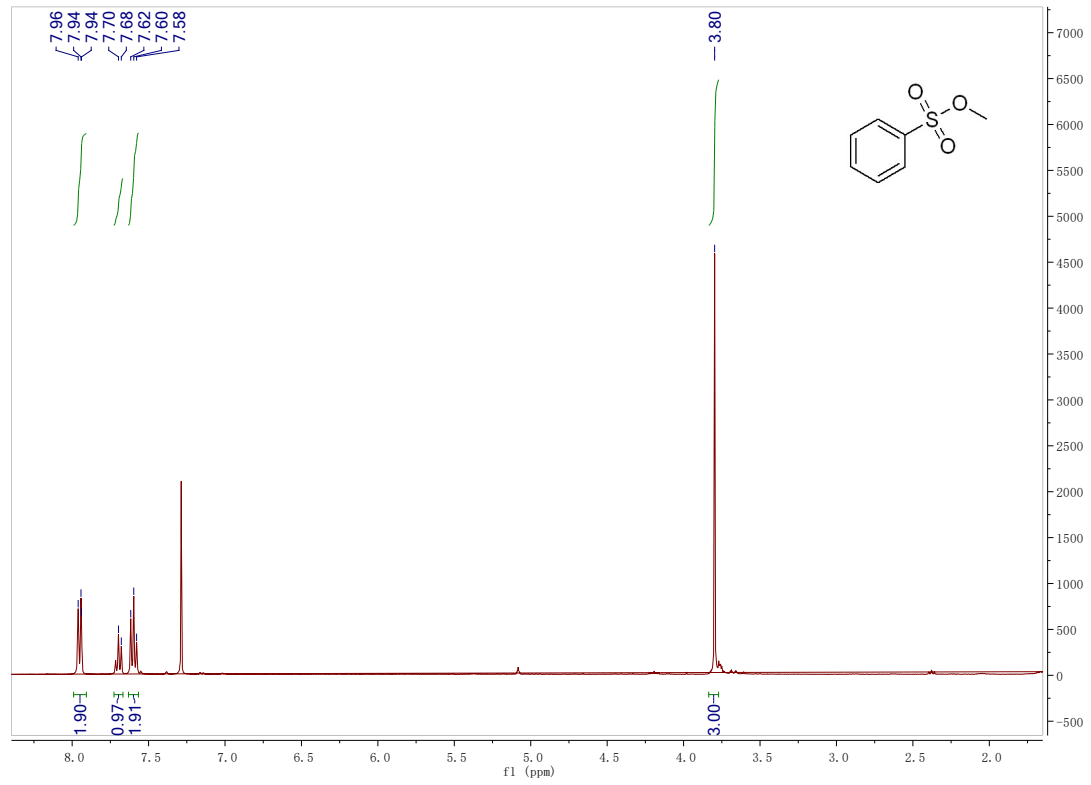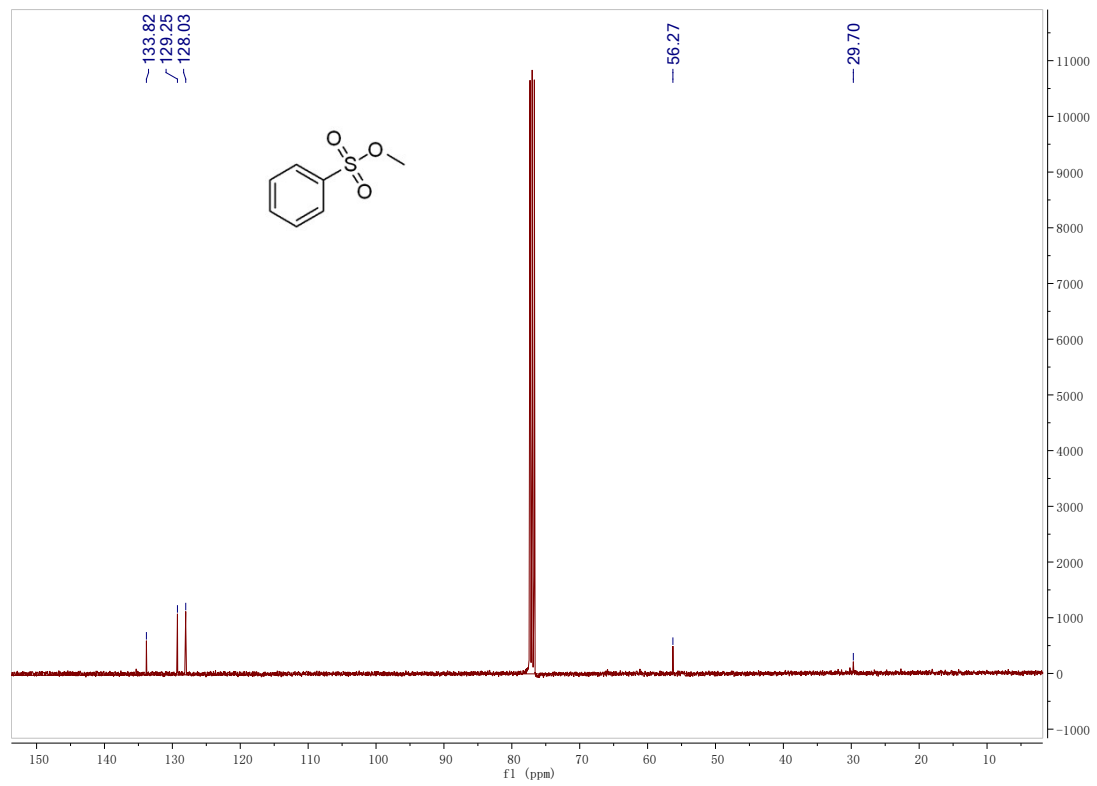

4b

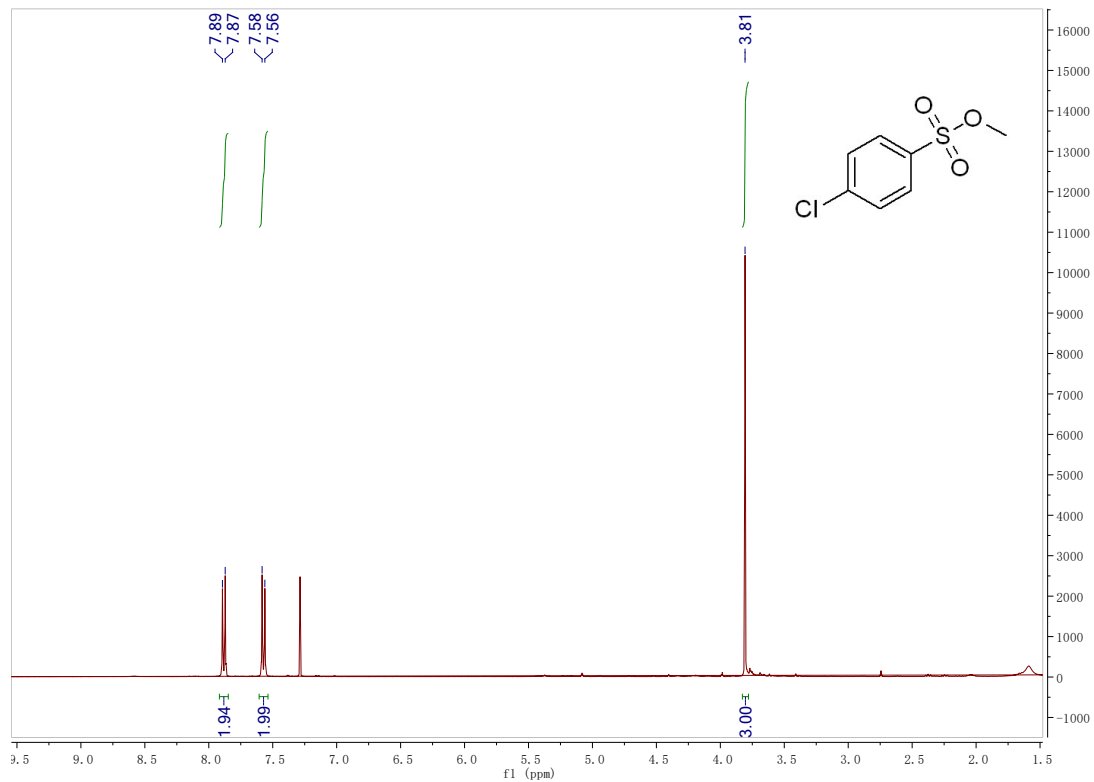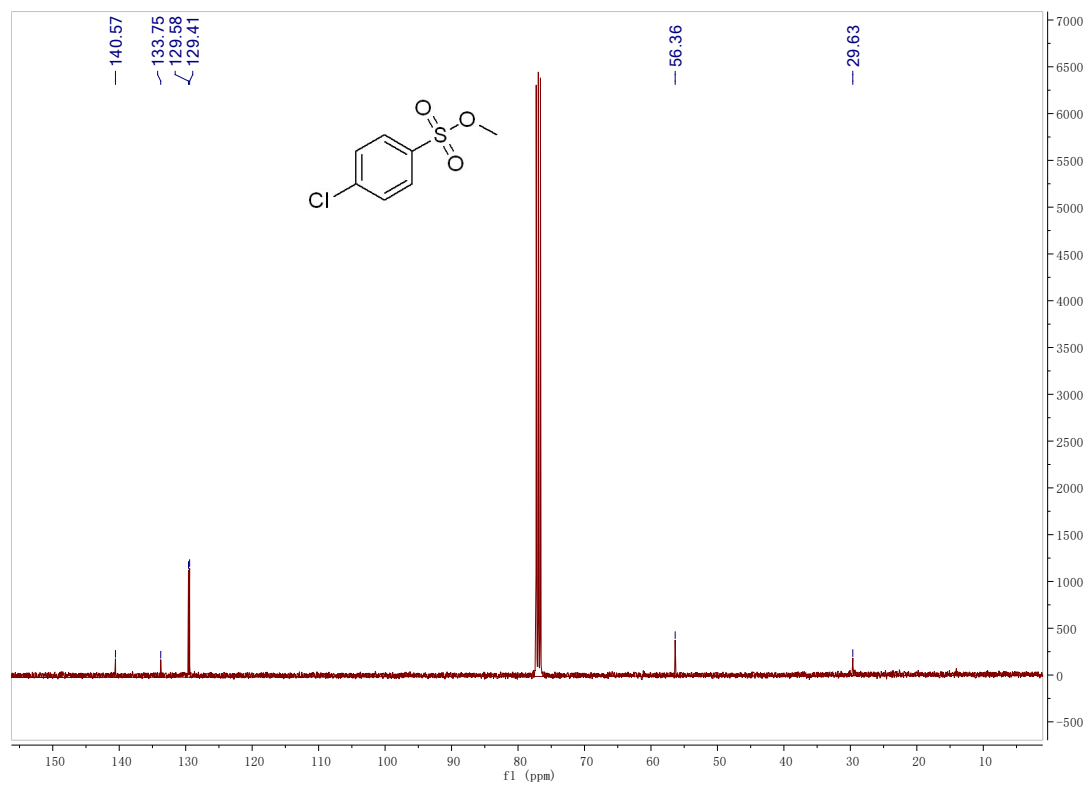

4c

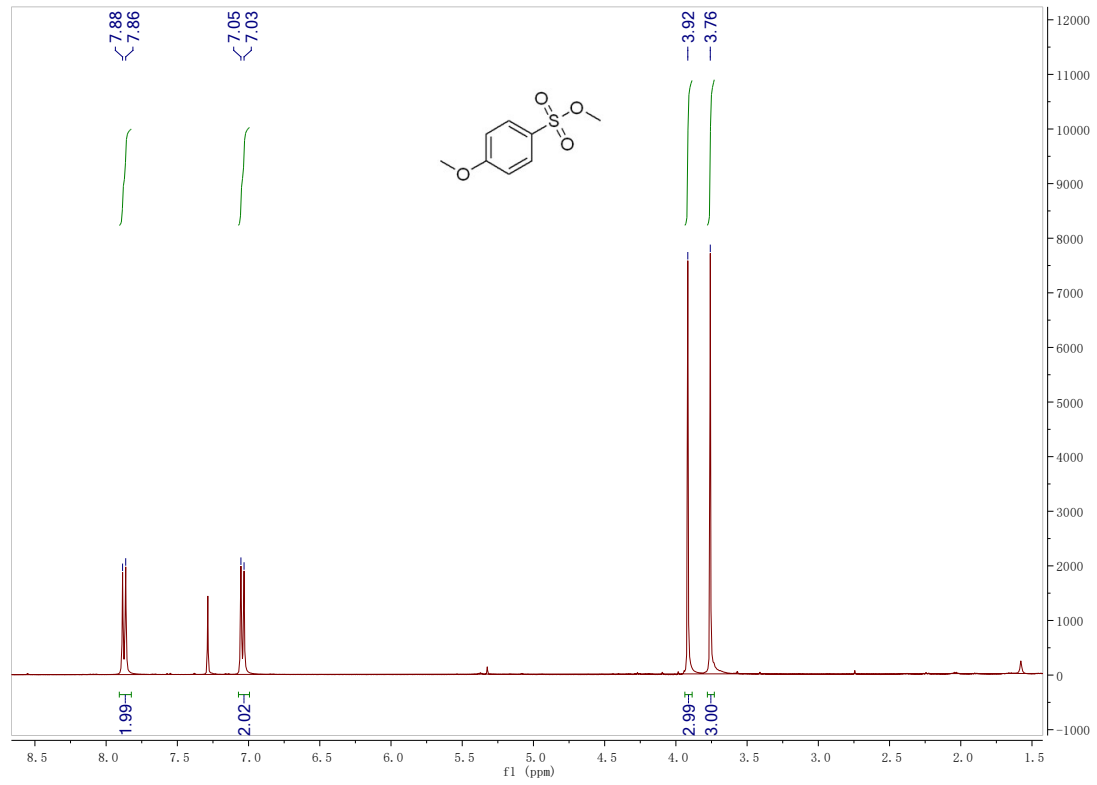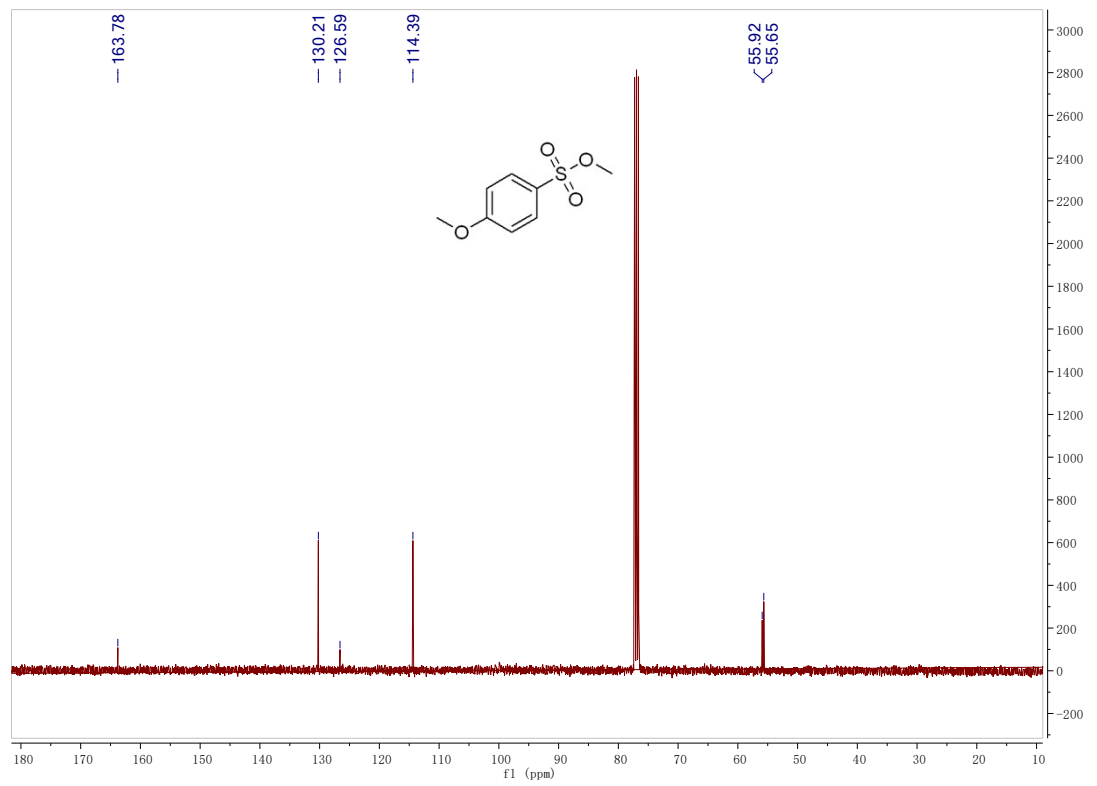

6a

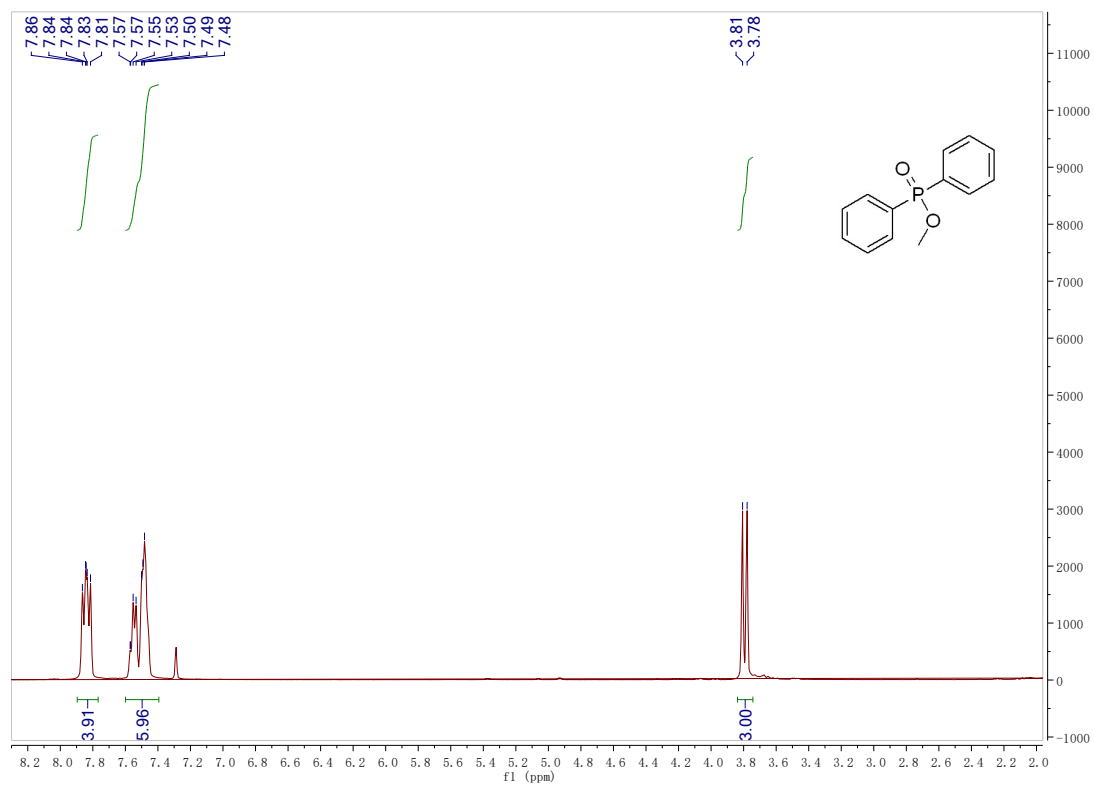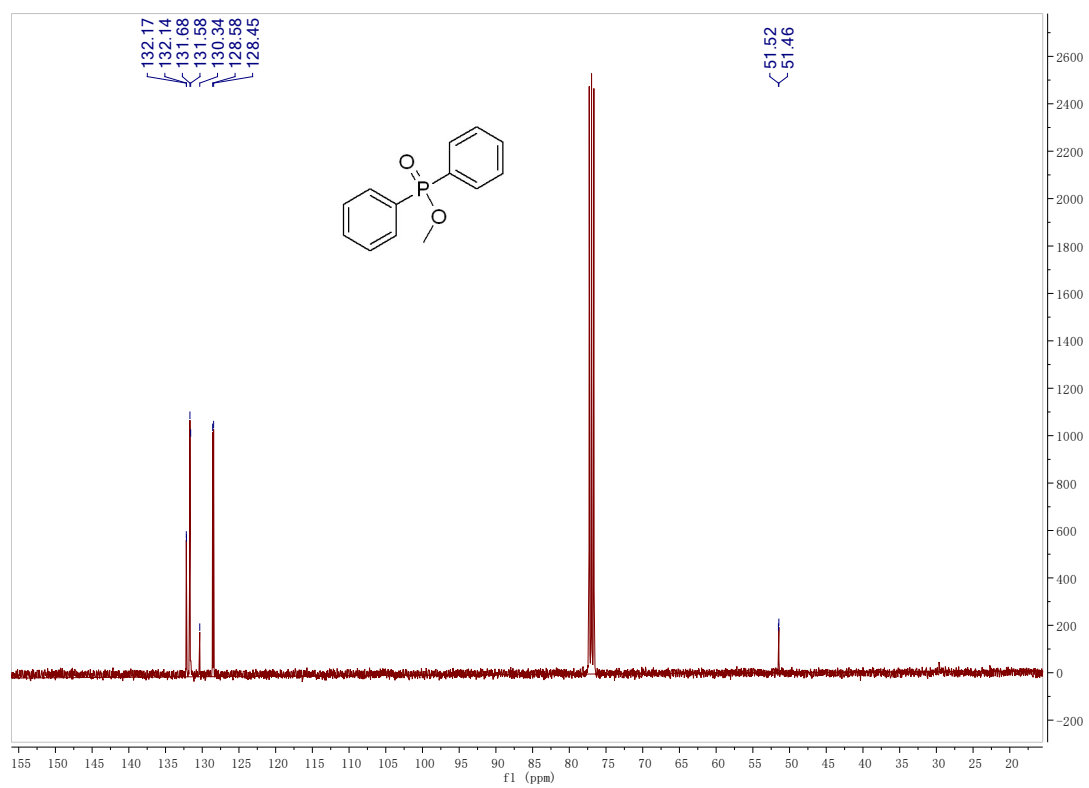



6b

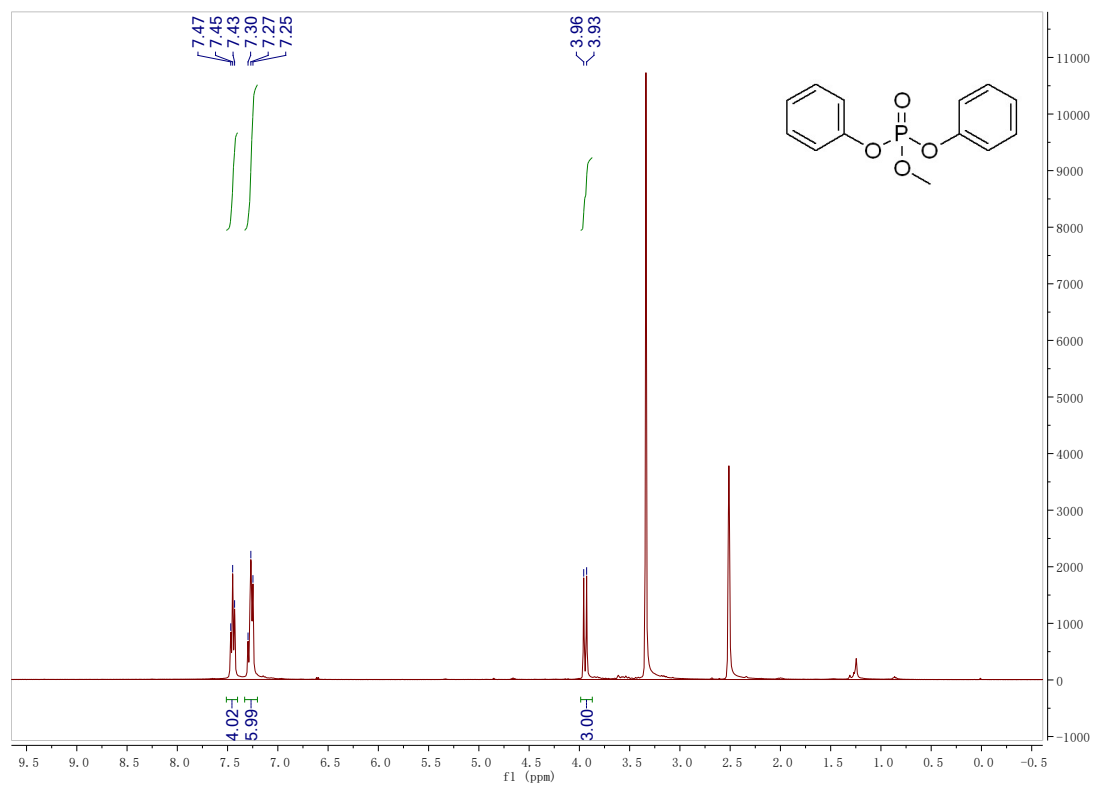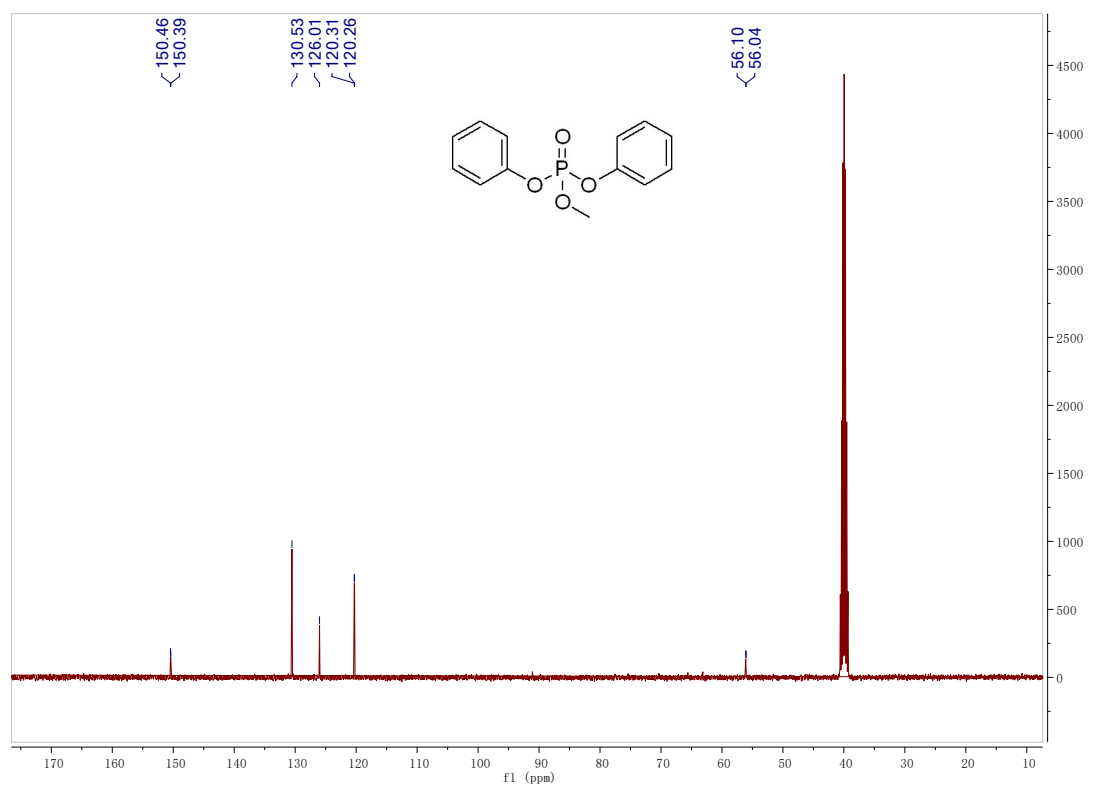

Supplement: d2ob00578f1.pdf [file d2ob00578f1.pdf]
